# Supplementary material for: Ligand dissociation/recoordination in fluorescent ionic zinc–salicylideneimine compounds: synthesis, characterization, photophysical properties, and 1H NMR studies
Source: Royal Society of Chemistry journal article supplement (doi:10.1039/c3dt51226f), 2013-01-01
Supplement: c3dt51226f.pdf [file c3dt51226f.pdf]

## Supporting Information

### **Ligand dissociation/recoordination in fluorescent ionic zinc–salicylideneimine compounds: synthesis, characterization, photophysical properties, and <sup>1</sup>H NMR studies**

**Ho-Wen Chiang, Yo-Ting Su and Jing-Yun Wu\***

*Department of Applied Chemistry, National Chi Nan University, Nantou 545, Taiwan. Fax:*

*+886-49-2917956; Tel: +886-49-2910960-4918; E-mail: [jyunwu@ncnu.edu.tw](mailto:jyunwu@ncnu.edu.tw)*

(a)

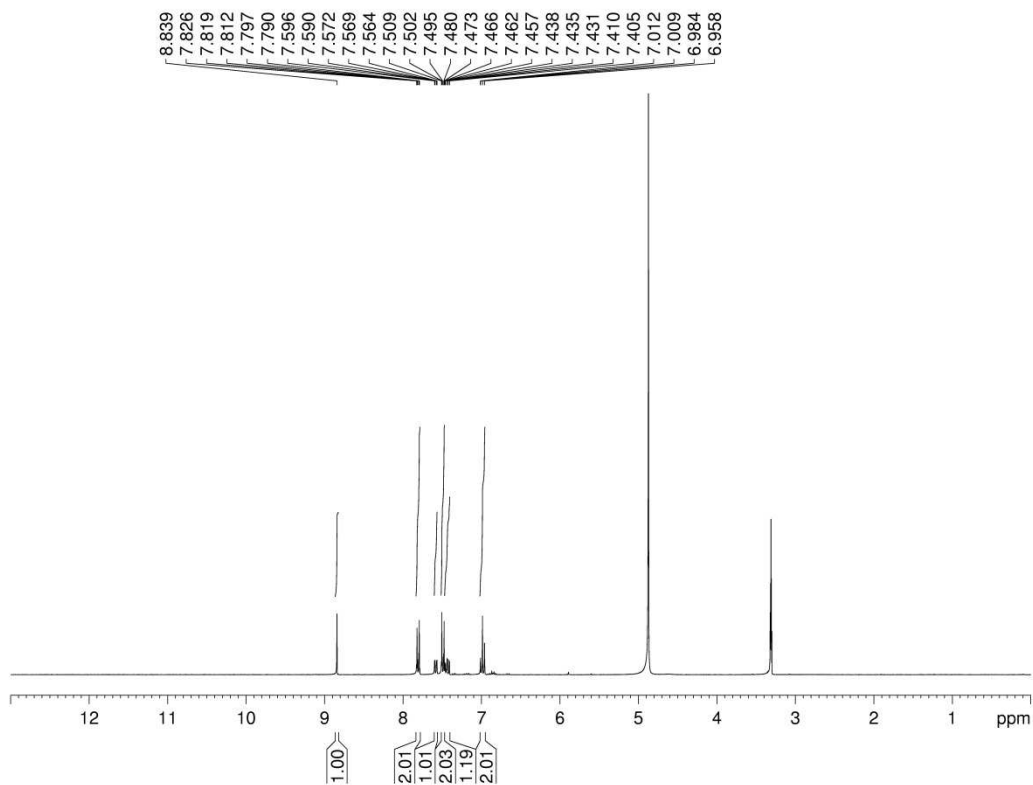

(b)

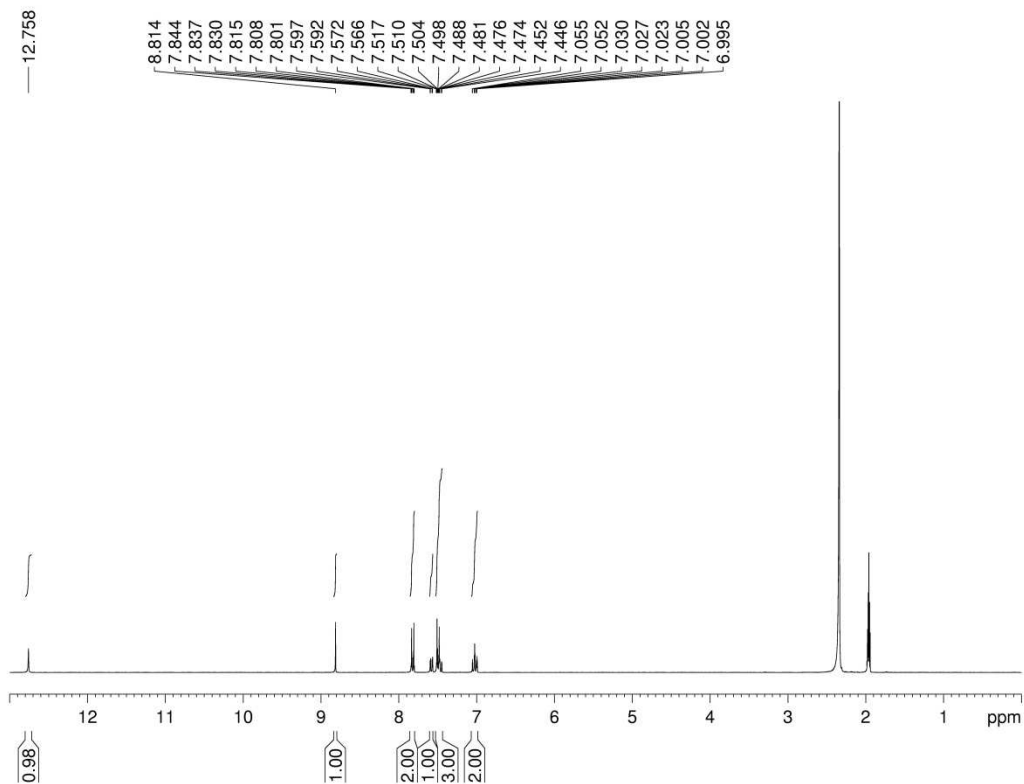

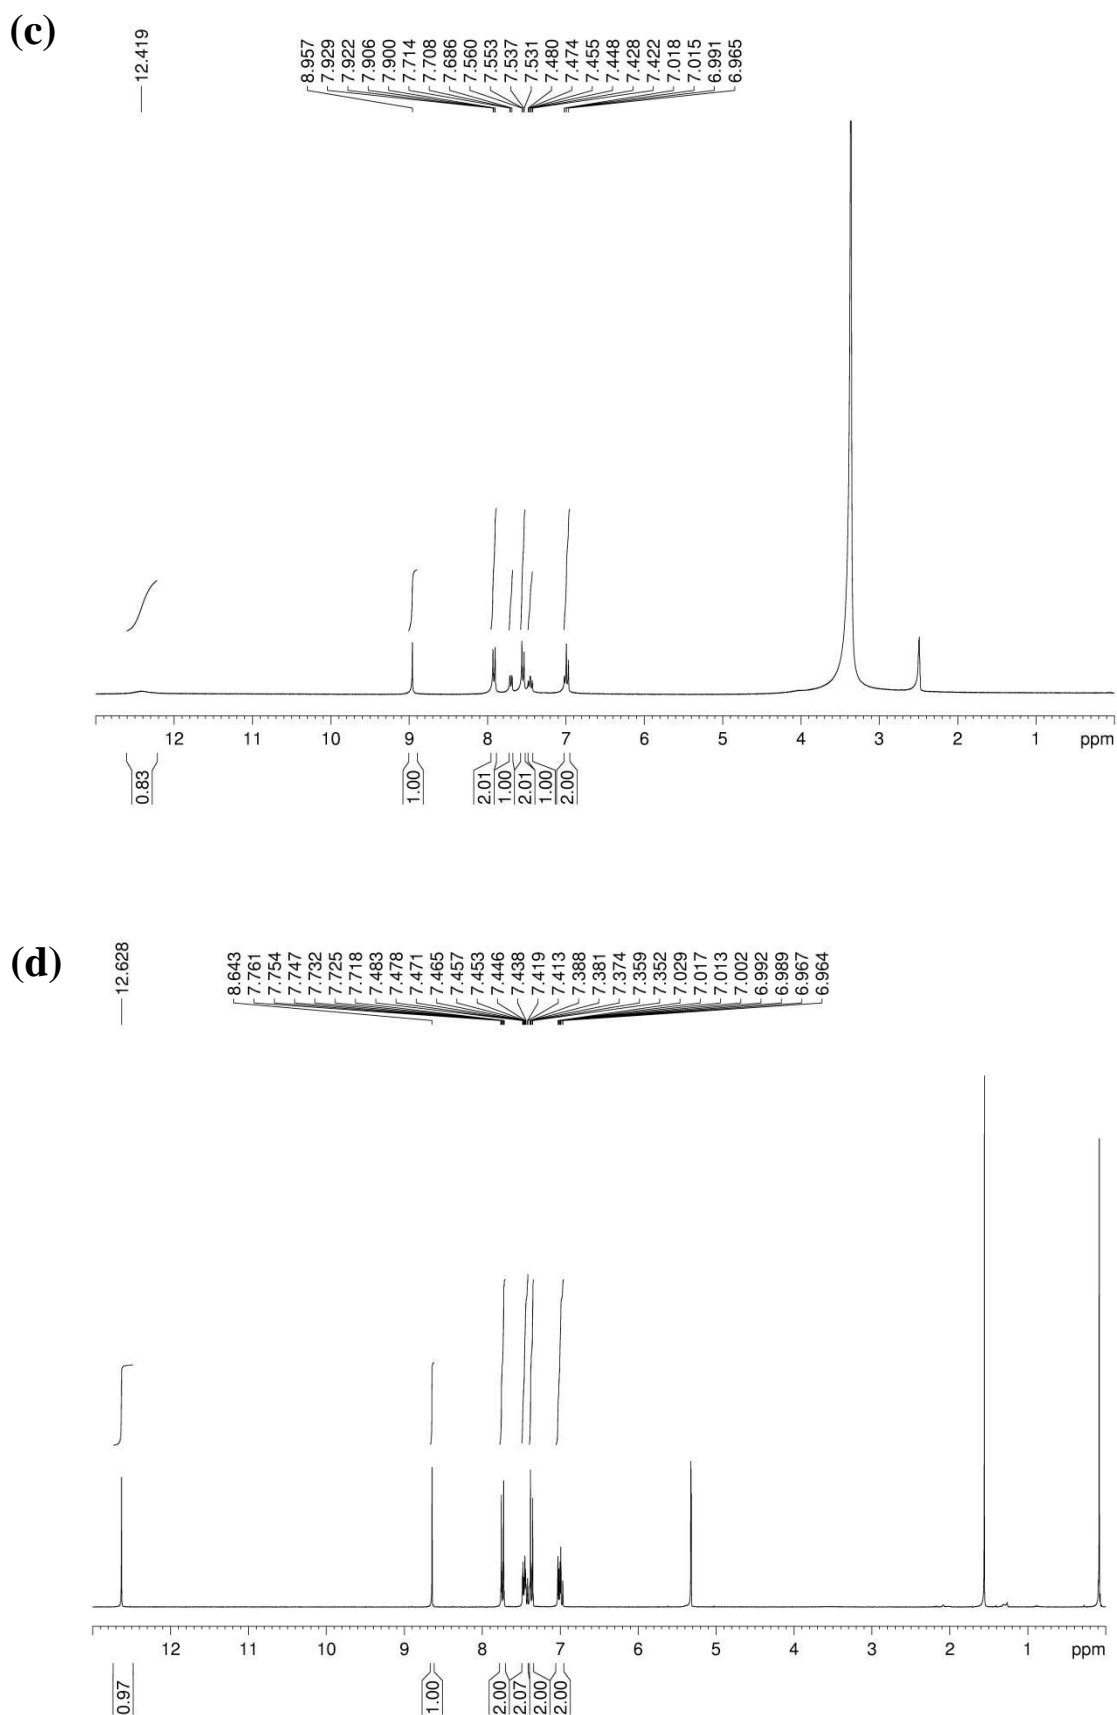

**Fig. S1**  $^1\text{H}$  NMR spectra of 4-(salicylideneimino)benzointrile ( $\text{Hsal}^{\text{H}}\text{-4-CN}$ ) in (a)  $\text{MeOH-}d_4$ , (b)  $\text{ACN-}d_3$ , (c)  $\text{DMSO-}d_6$ , and (d)  $\text{DCM-}d_2$ .

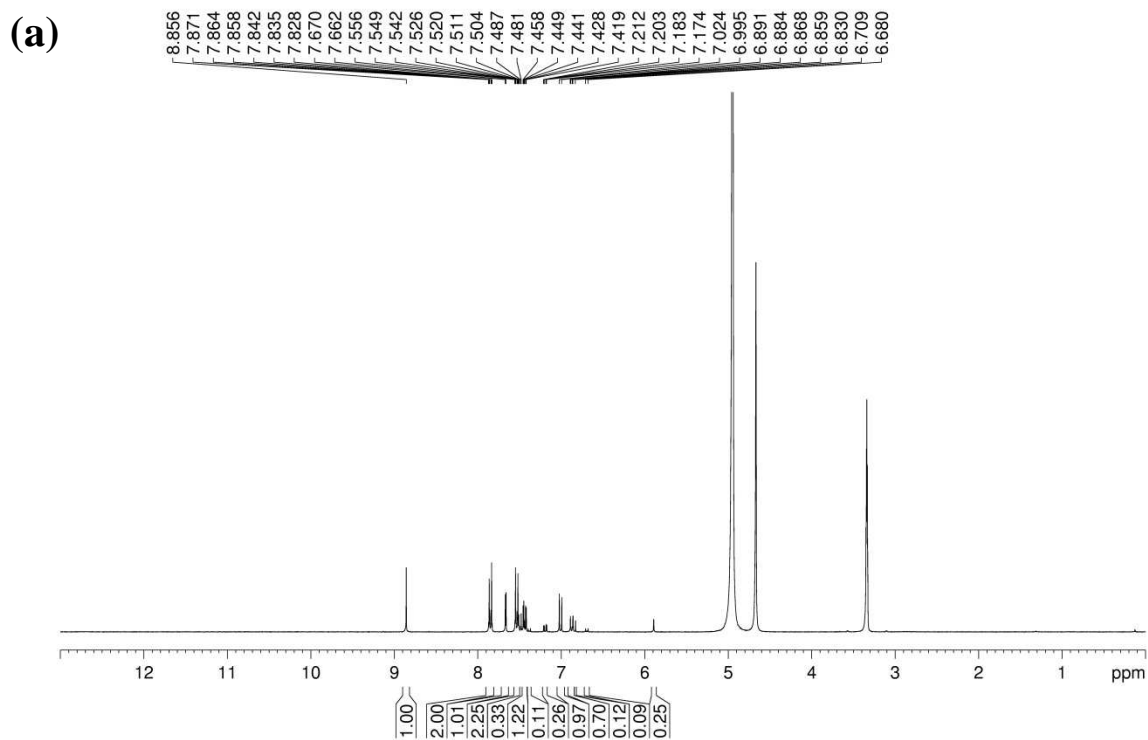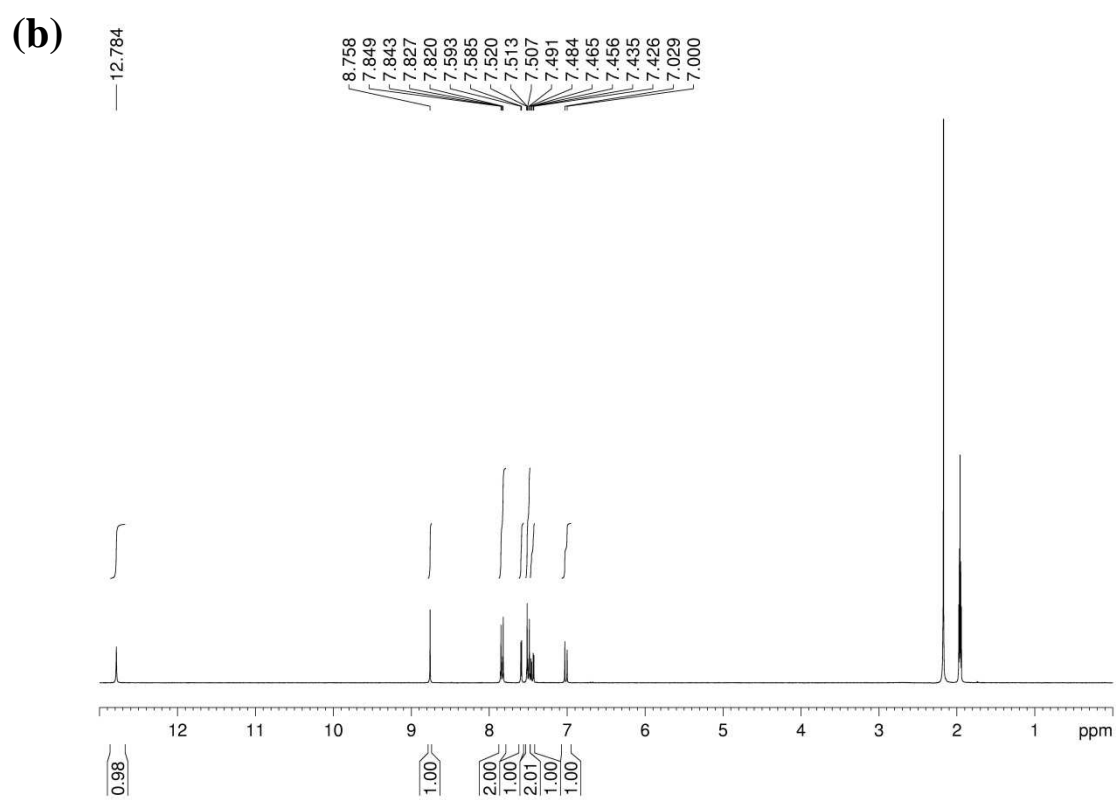

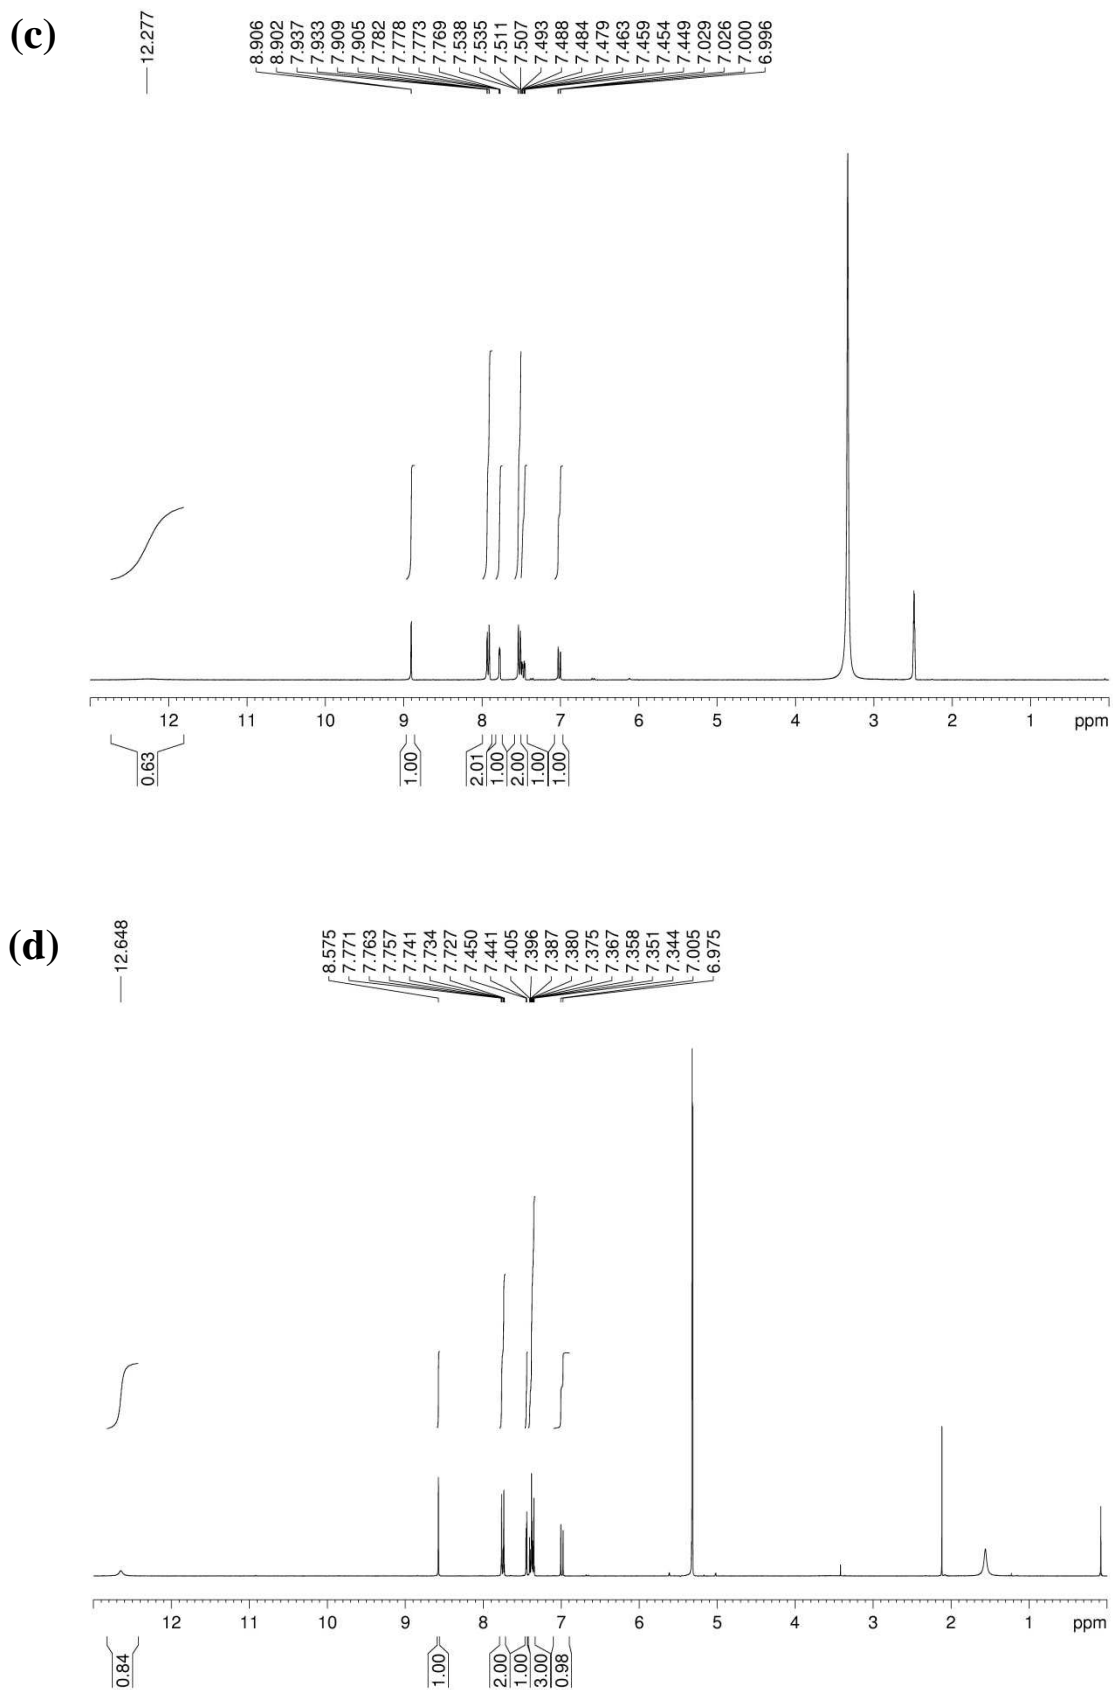

**Fig. S2**  $^1\text{H}$  NMR spectra of 4-(5'-chlorosalicylideneimino)benzonitrile ( $\text{Hsal}^{\text{Cl}}\text{-4-CN}$ ) in (a)  $\text{MeOH-}d_4$ , (b)  $\text{ACN-}d_3$ , (c)  $\text{DMSO-}d_6$ , and (d)  $\text{DCM-}d_2$ .

(a)

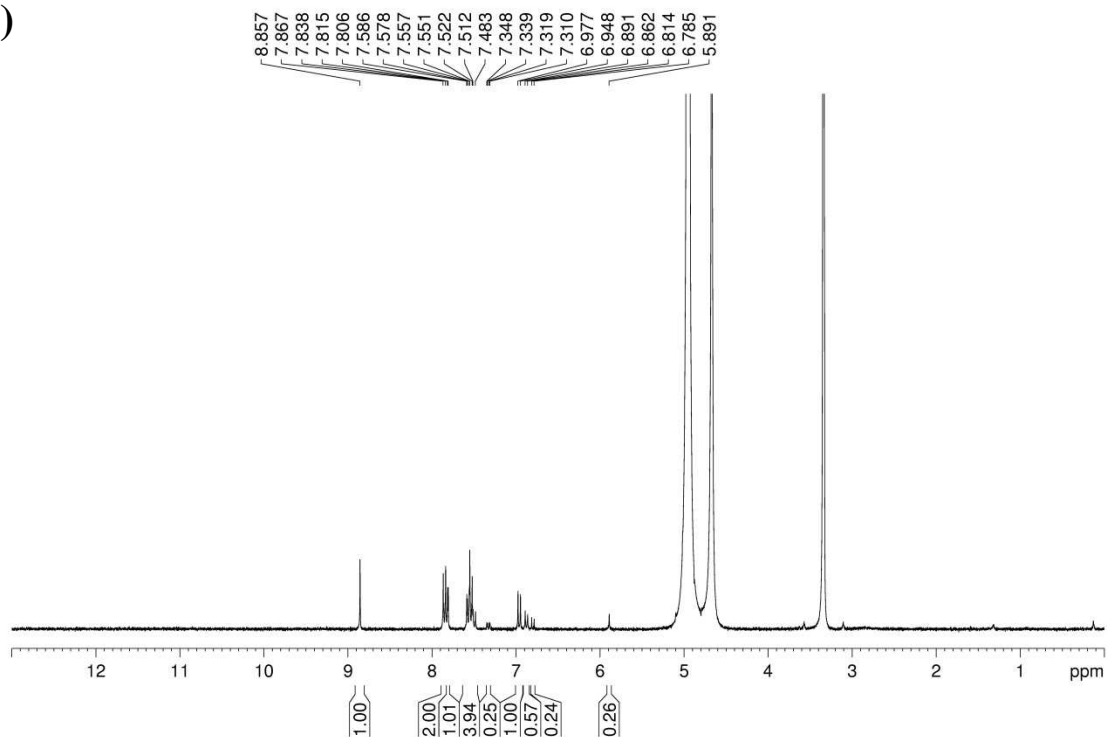

(b)

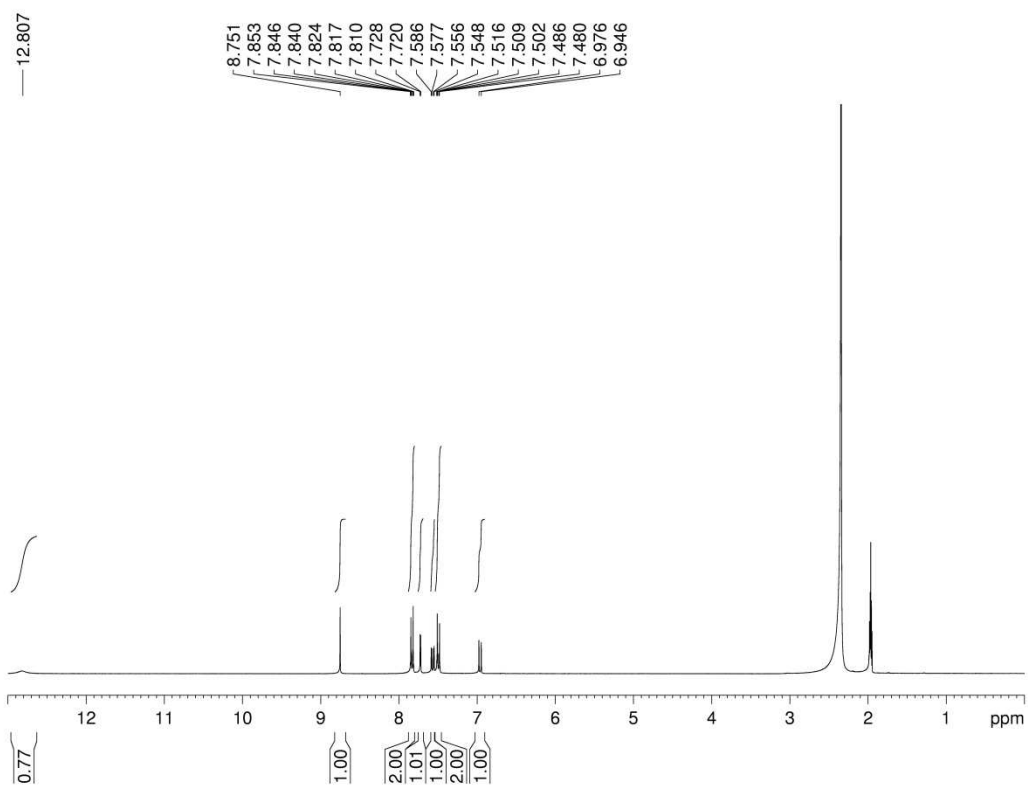

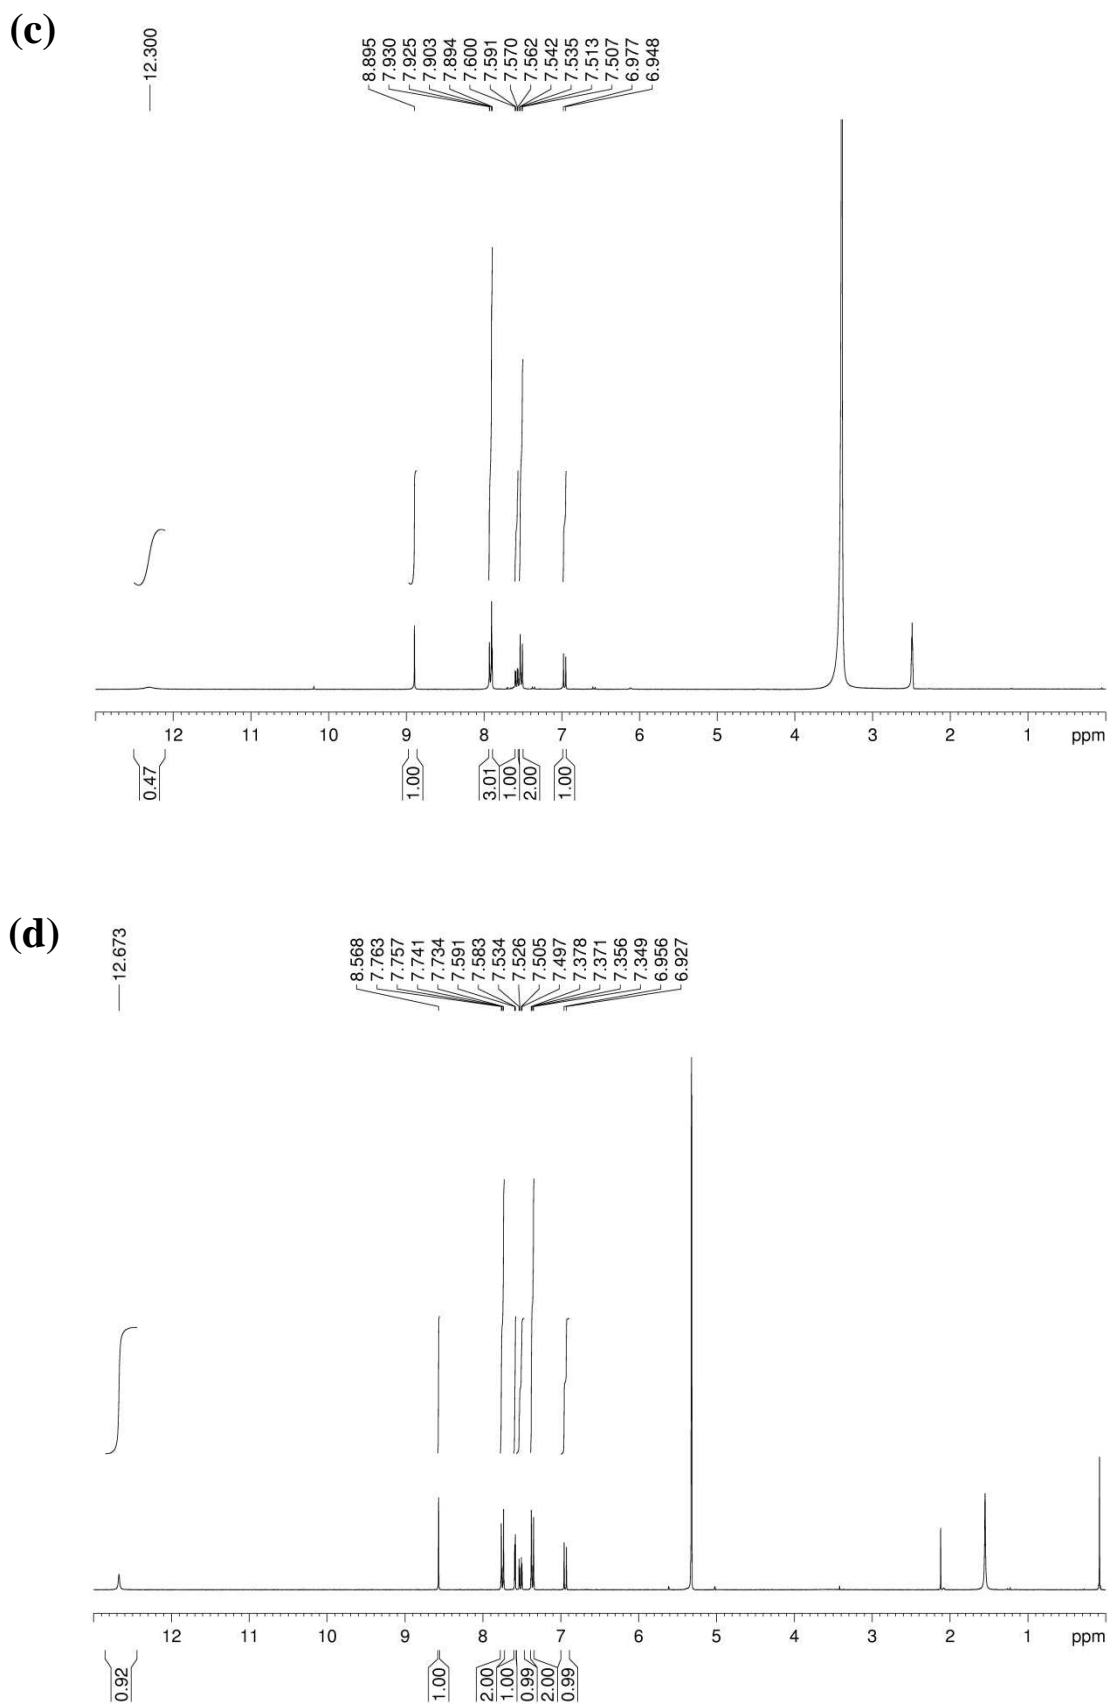

**Fig. S3**  $^1\text{H}$  NMR spectra of 4-(5'-bromosalicylideneimino)benzotrile ( $\text{Hsal}^{\text{Br}}\text{-4-CN}$ ) in (a)  $\text{MeOH-}d_4$ , (b)  $\text{ACN-}d_3$ , (c)  $\text{DMSO-}d_6$ , and (d)  $\text{DCM-}d_2$ .

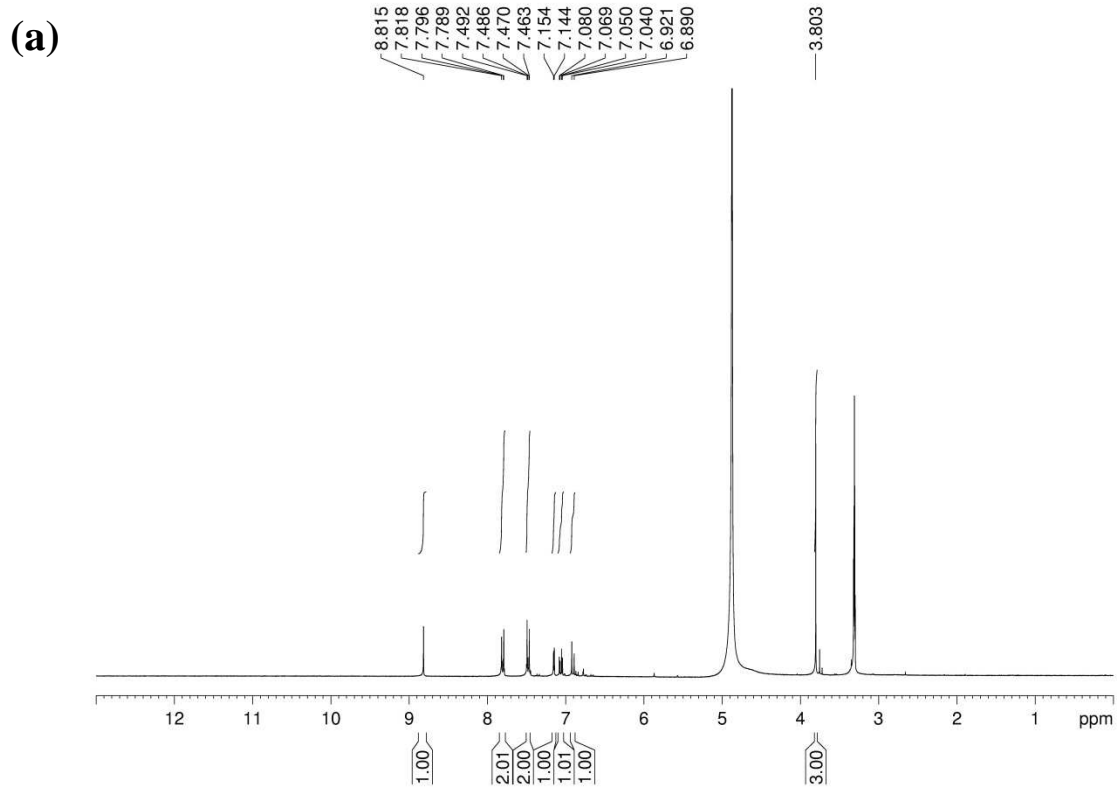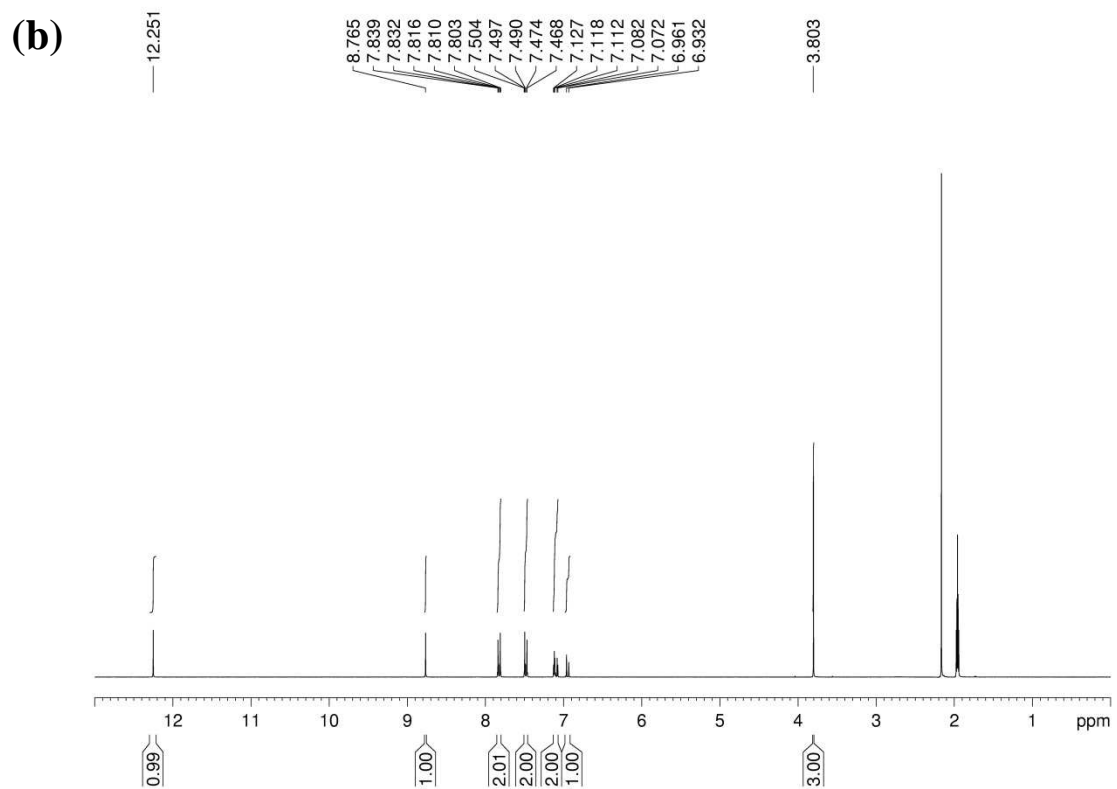



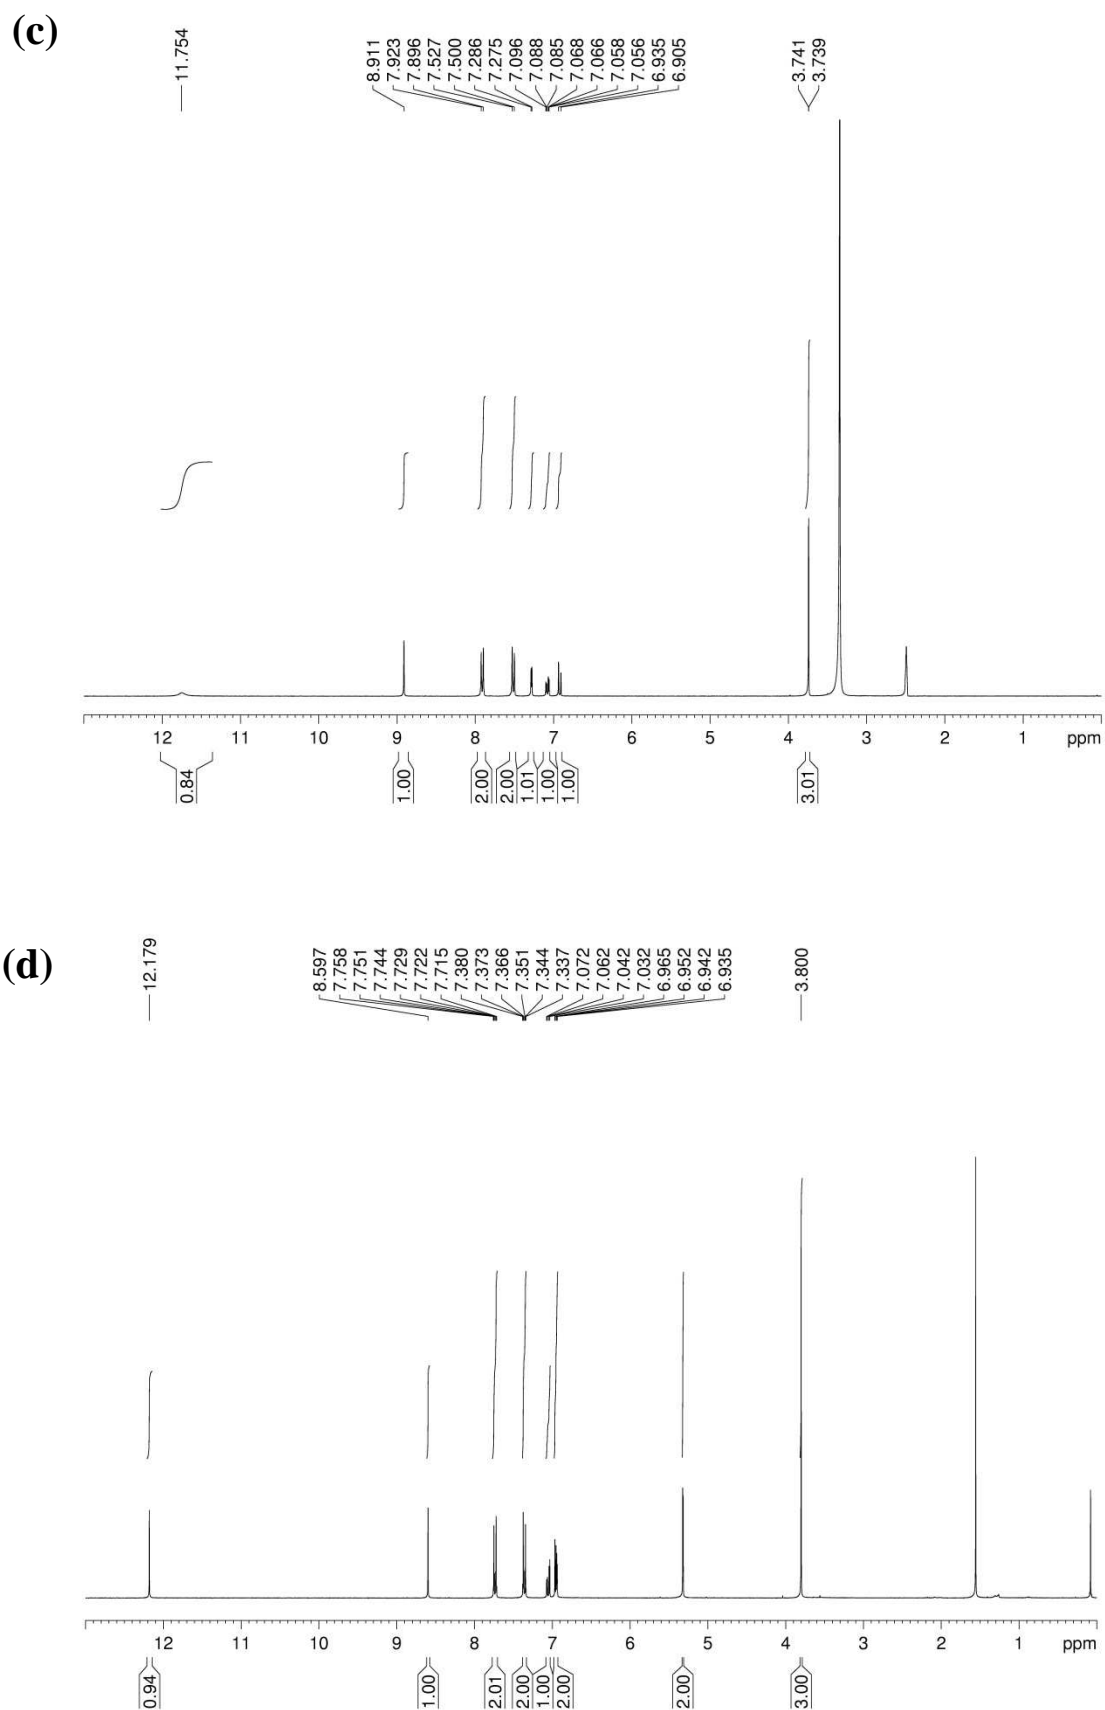

**Fig. S4**  $^1\text{H}$  NMR spectra of 4-(5'-methoxysalicylideneimino)benzonitrile (Hsal<sup>OMe</sup>-4-CN) in (a) MeOH- $d_4$ , (b) ACN- $d_3$ , (c) DMSO- $d_6$ , and (d) DCM- $d_2$ .

(a)

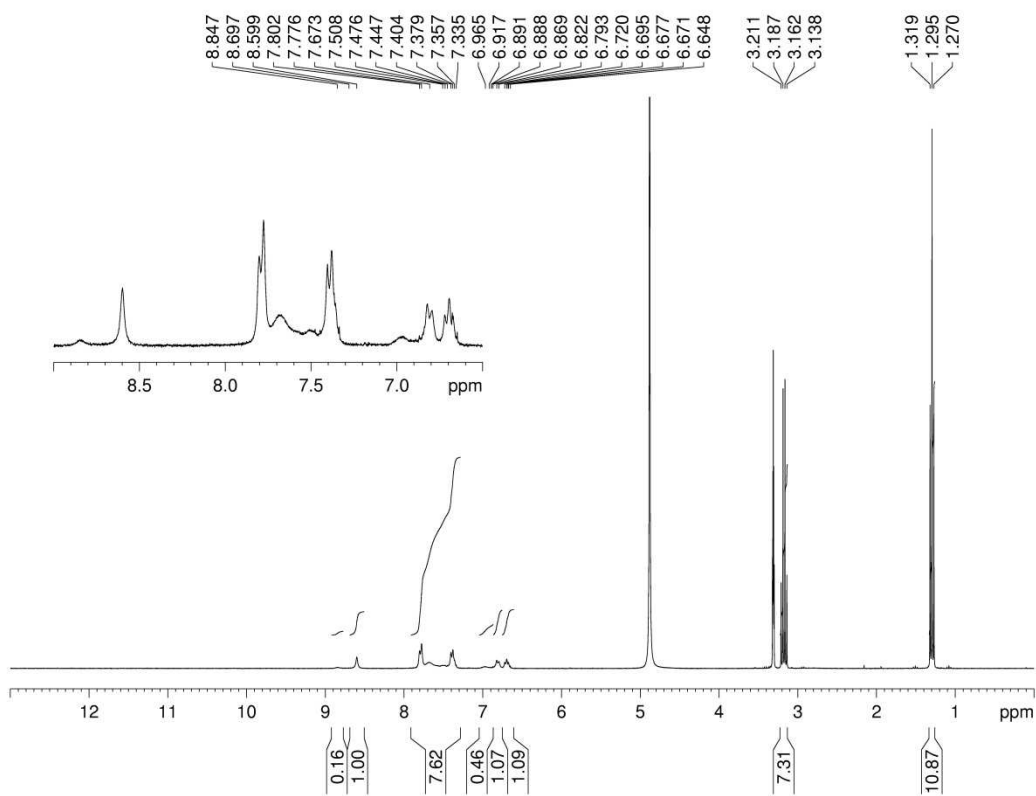

(b)

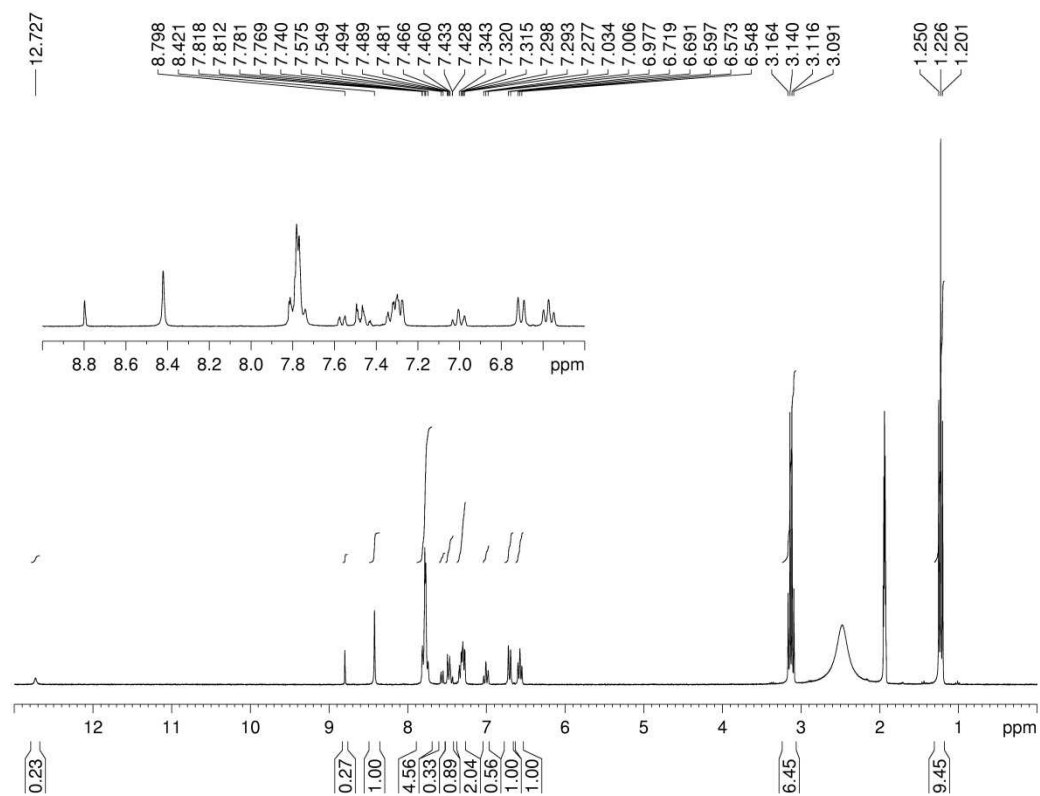

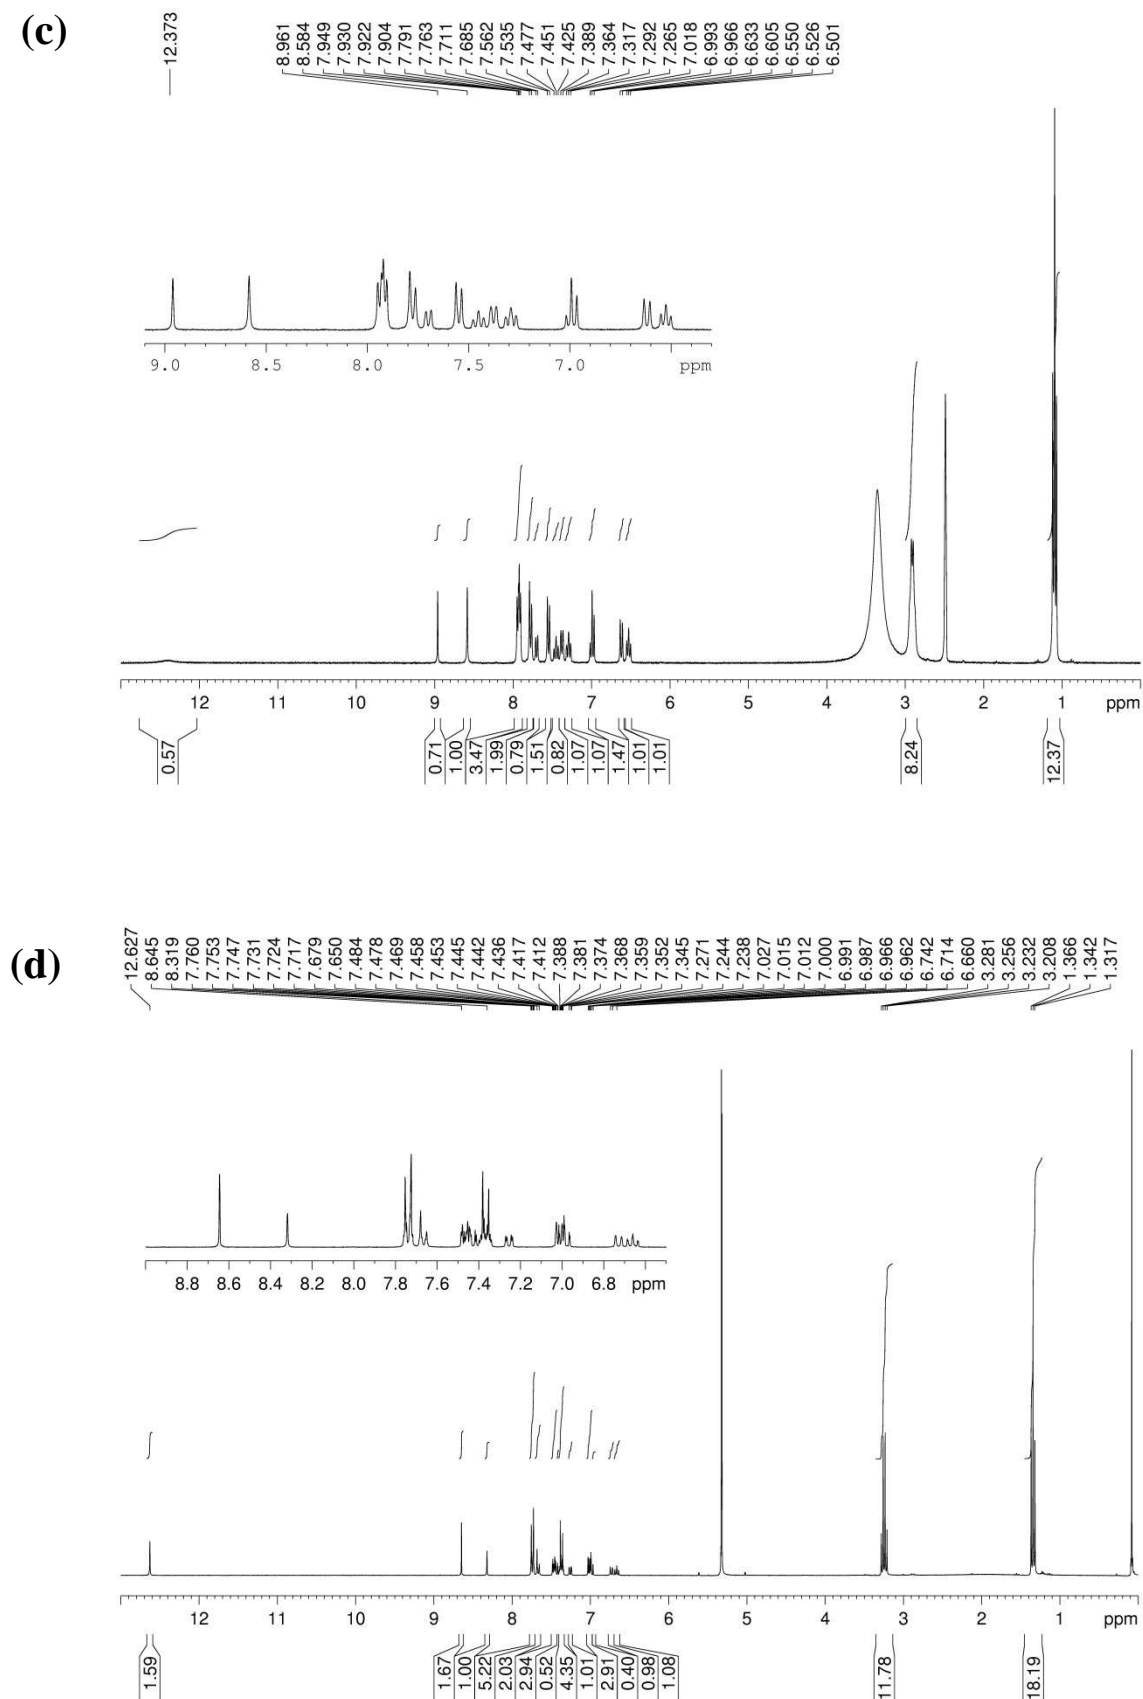

**Fig. S5**  $^1\text{H}$  NMR spectra of  $[\text{HNEt}_3][\text{Zn}(\text{sal}^{\text{H}}\text{-4-CN})\text{Cl}_2]$  (**1**) in (a)  $\text{MeOH-}d_4$ , (b)  $\text{ACN-}d_3$ , (c)  $\text{DMSO-}d_6$ , and (d)  $\text{DCM-}d_2$ .

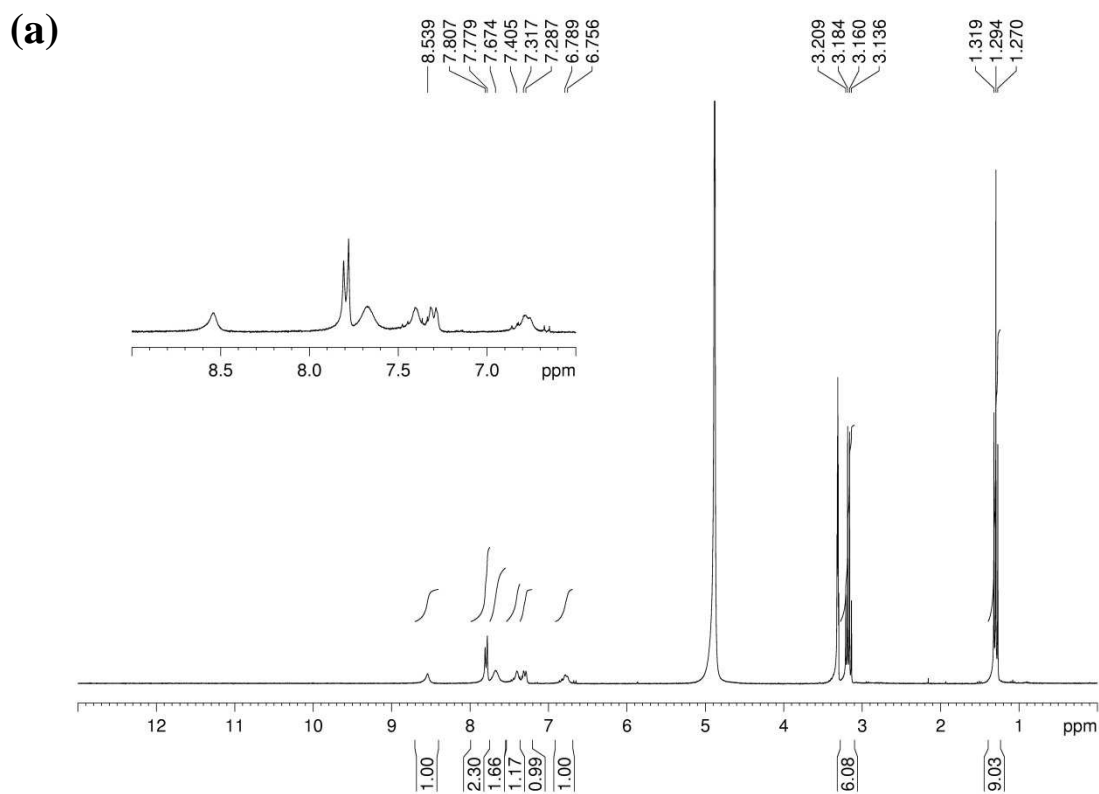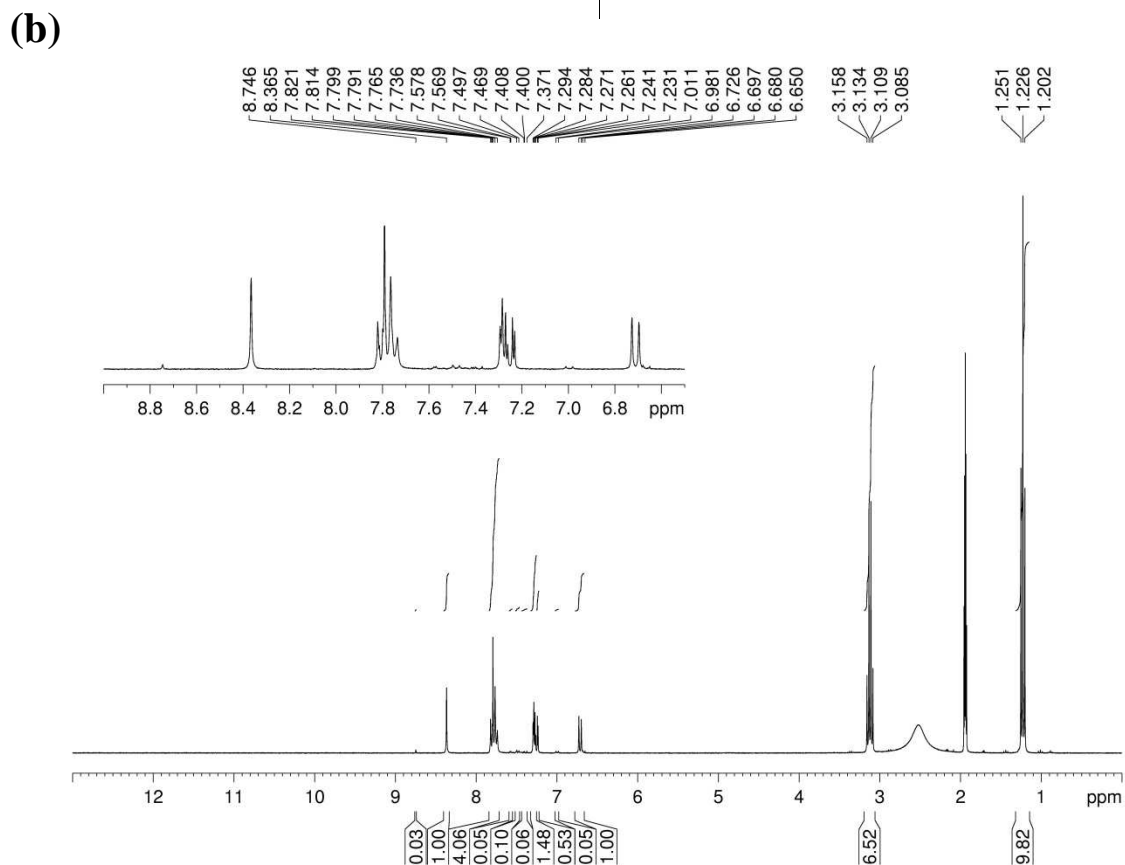

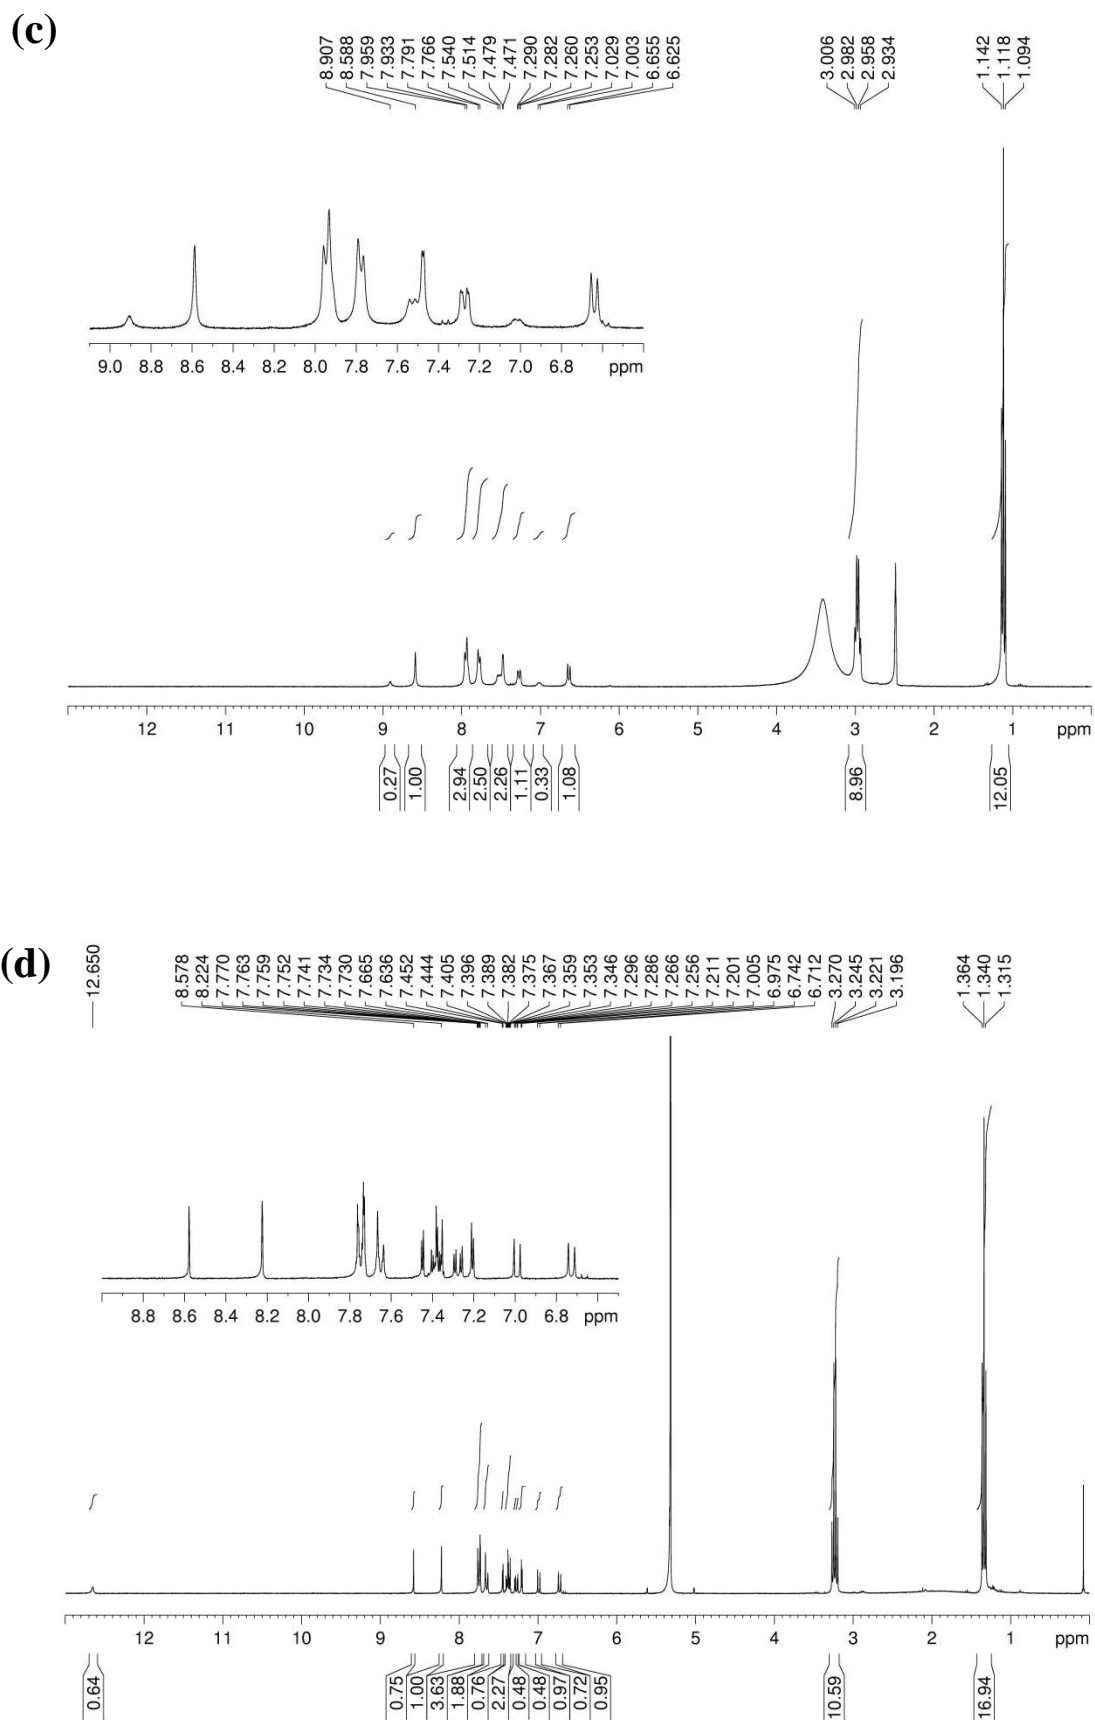

**Fig. S6**  $^1\text{H}$  NMR spectra of  $[\text{HNEt}_3][\text{Zn}(\text{sal}^{\text{Cl}^-}\text{-4-CN})\text{Cl}_2]$  (**2**) in (a)  $\text{MeOH-}d_4$ , (b)  $\text{ACN-}d_3$ , (c)  $\text{DMSO-}d_6$ , and (d)  $\text{DCM-}d_2$ .

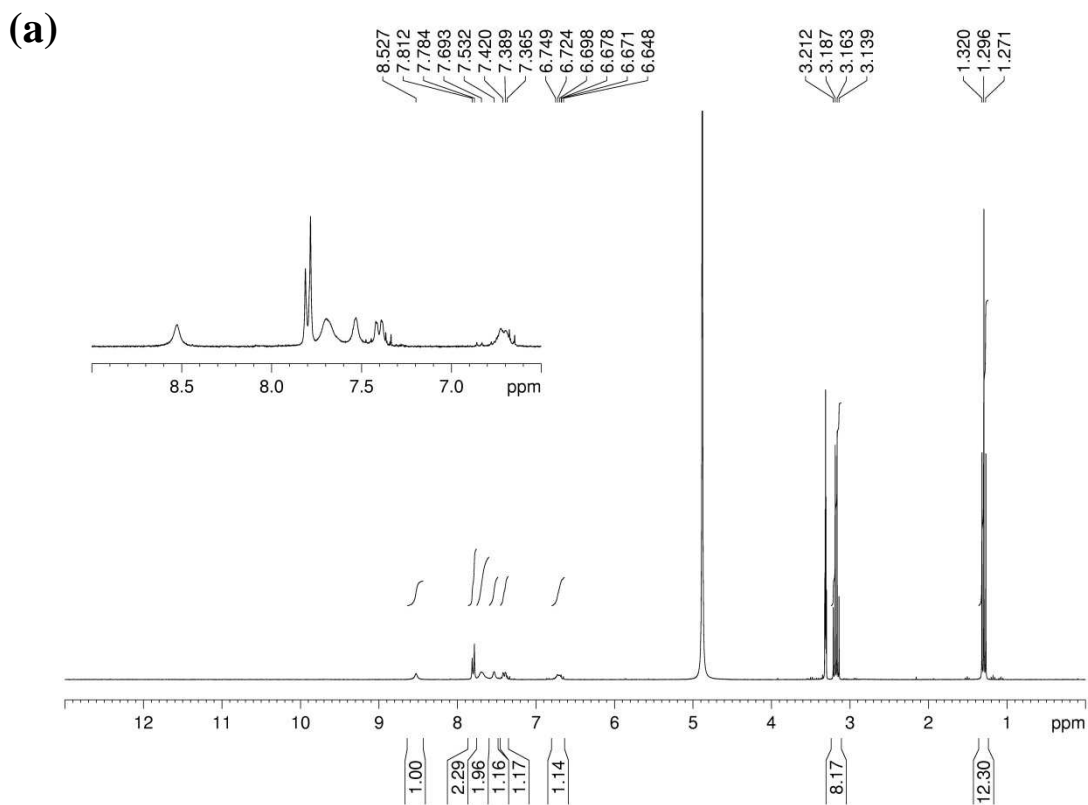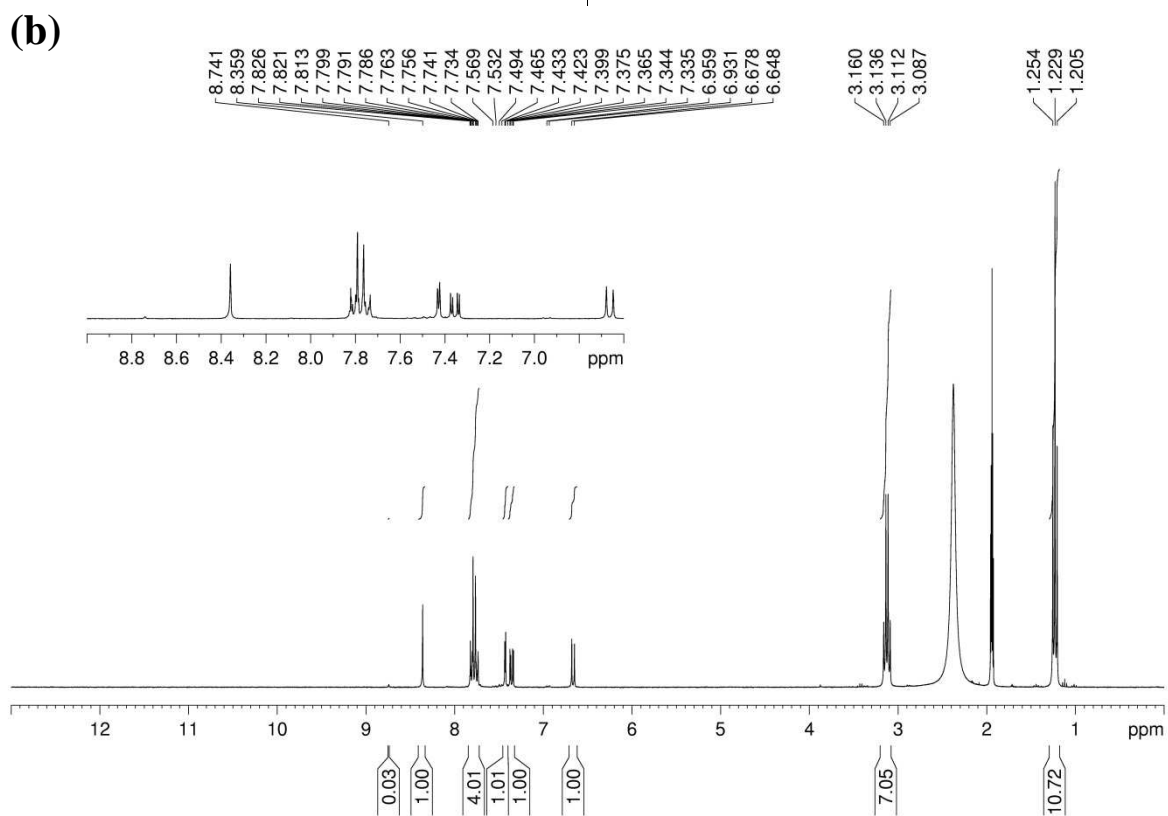

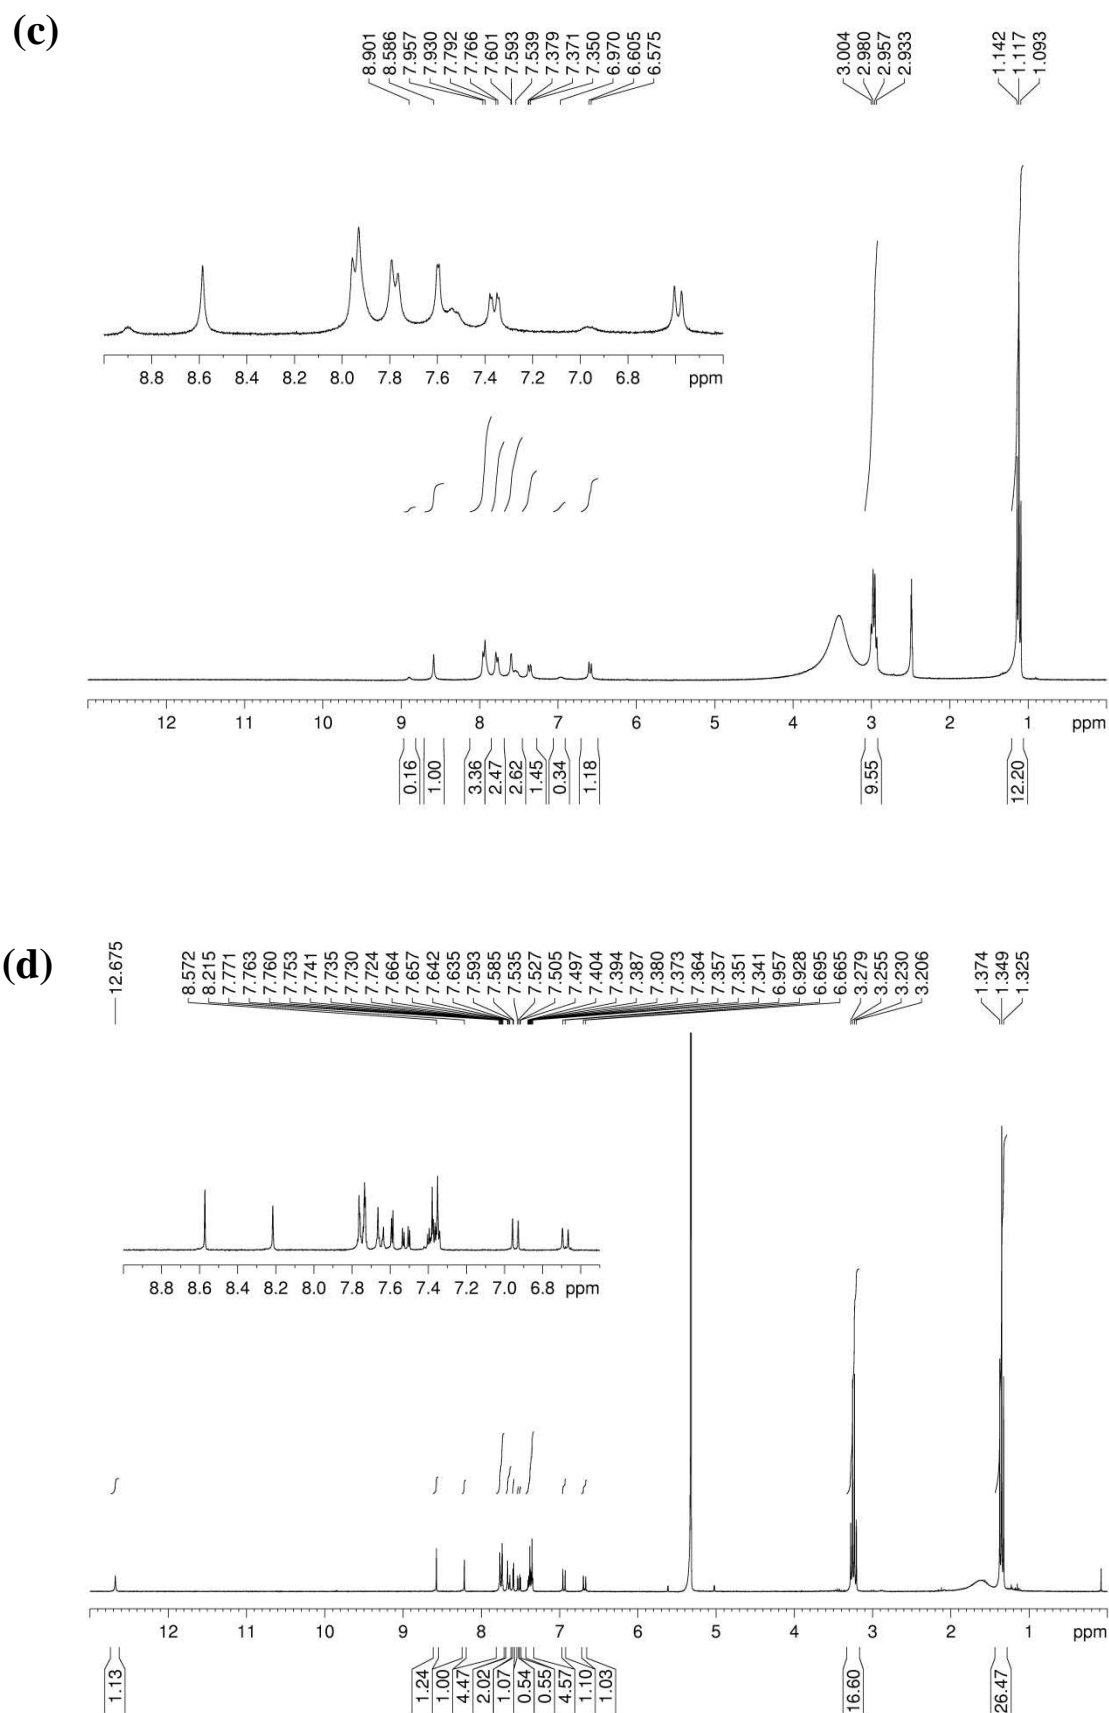

**Fig. S7**  $^1\text{H}$  NMR spectra of  $[\text{HNEt}_3][\text{Zn}(\text{sal}^{\text{Br-4-CN}})\text{Cl}_2]$  (**3**) in (a)  $\text{MeOH-}d_4$ , (b)  $\text{ACN-}d_3$ , (c)  $\text{DMSO-}d_6$ , and (d)  $\text{DCM-}d_2$ .

(a)

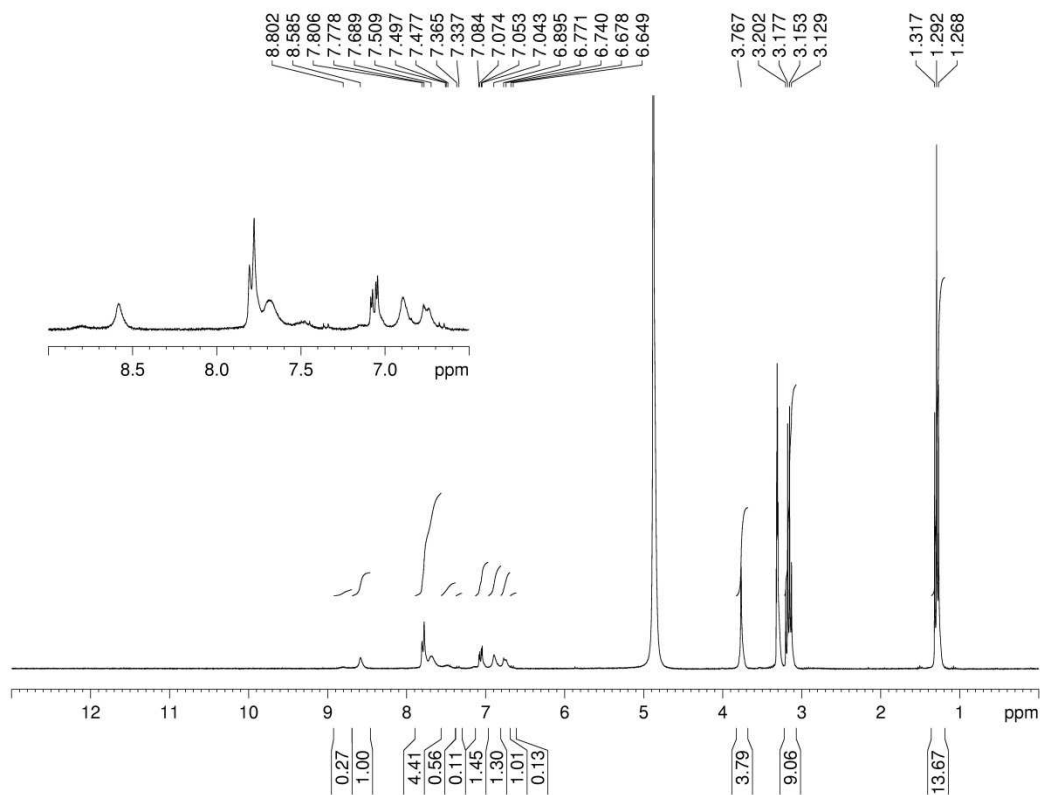

(b)

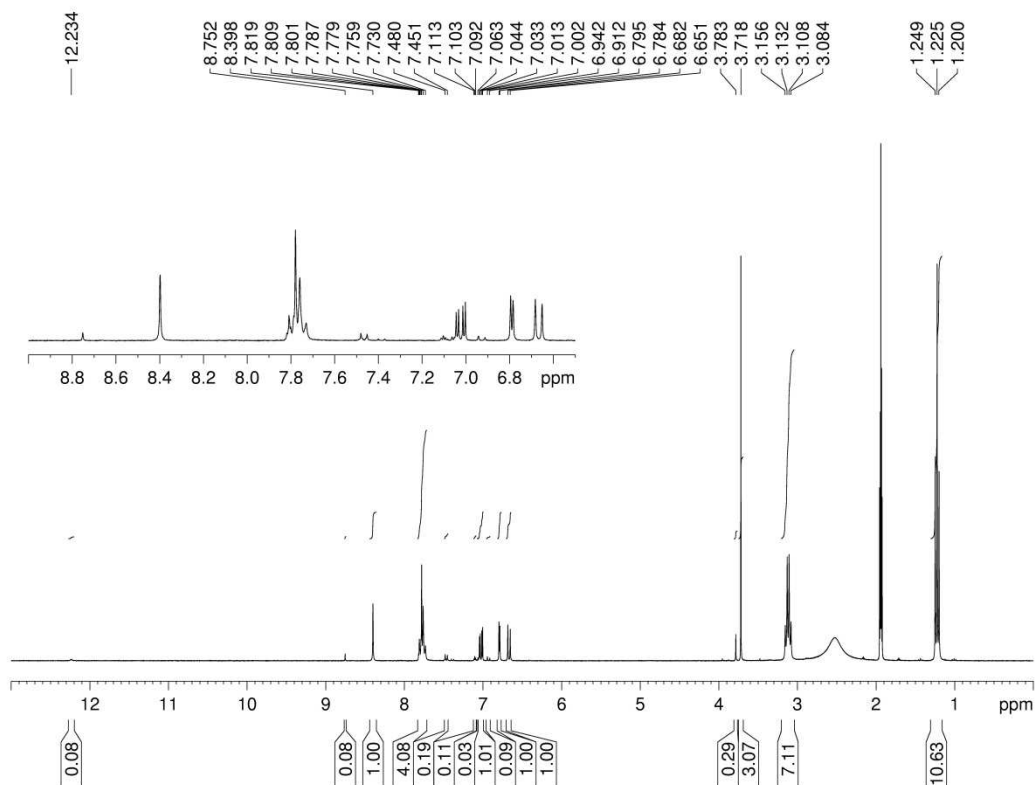



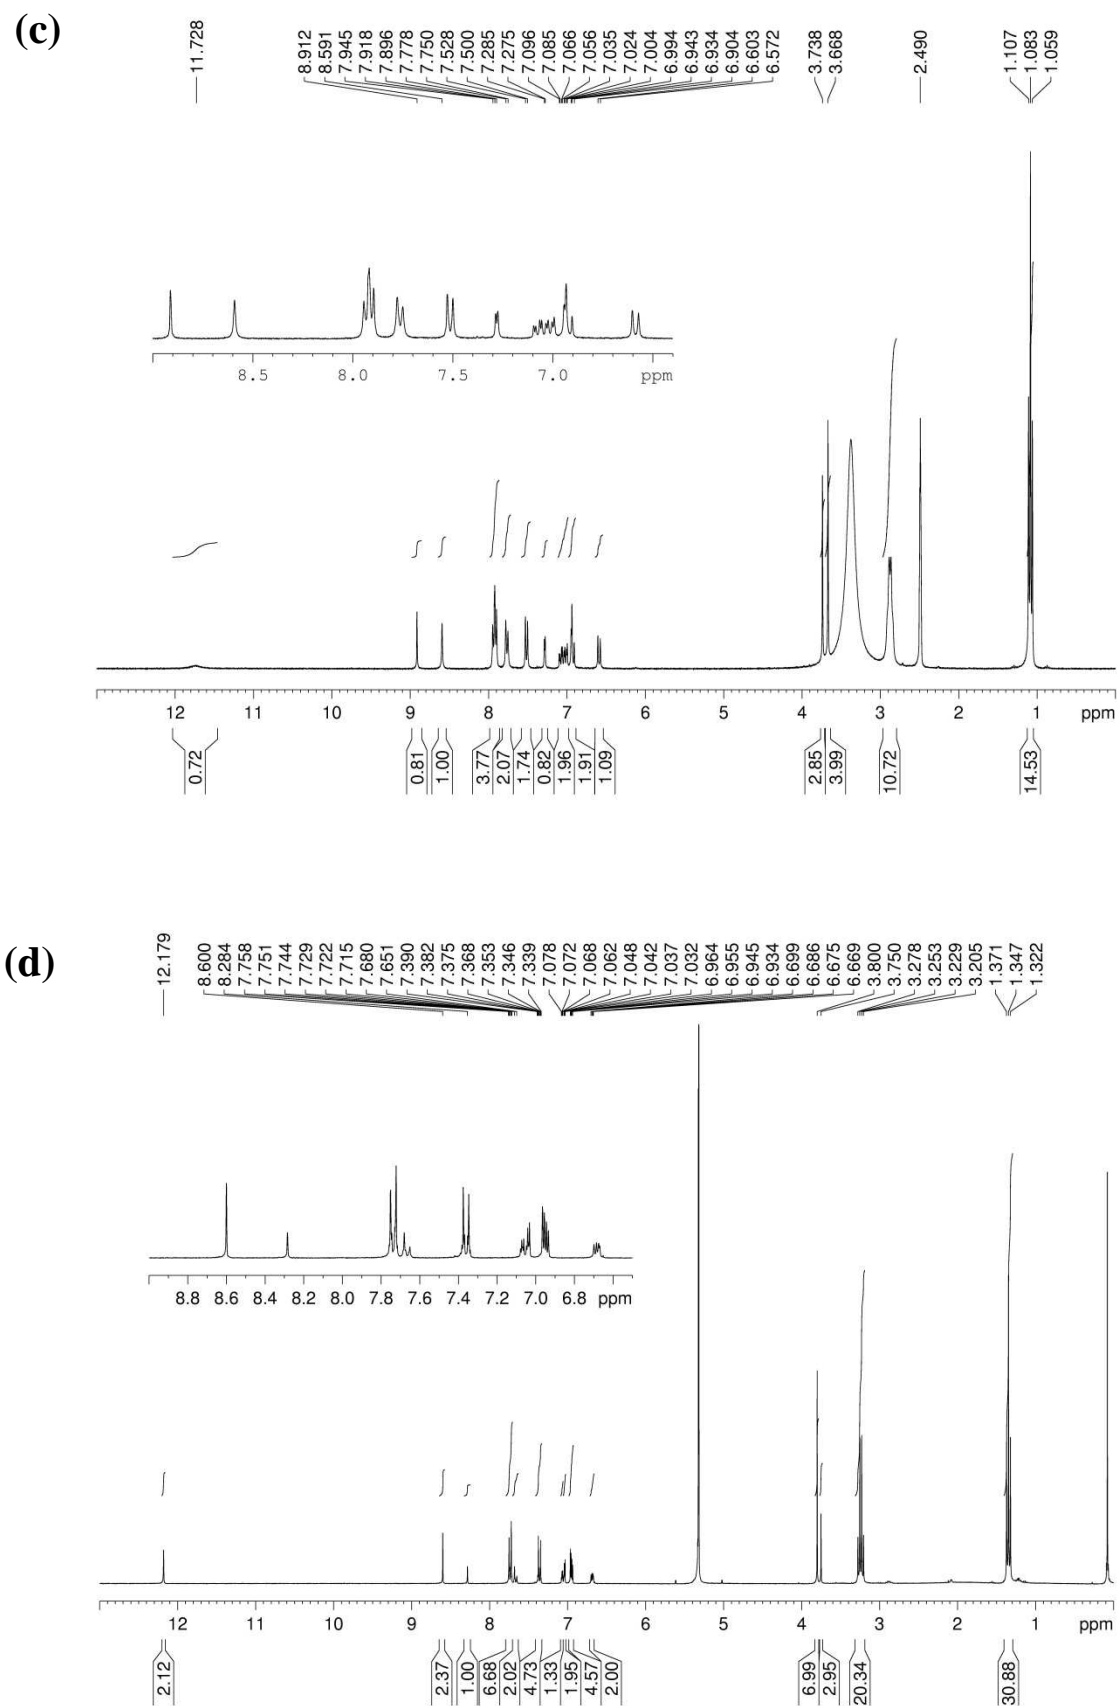

**Fig. S8**  $^1\text{H}$  NMR spectra of  $[\text{HNEt}_3][\text{Zn}(\text{sal}^{\text{OMe}}\text{-4-CN})\text{Cl}_2]$  (**4**) in (a)  $\text{MeOH-}d_4$ , (b)  $\text{ACN-}d_3$ , (c)  $\text{DMSO-}d_6$ , and (d)  $\text{DCM-}d_2$ .

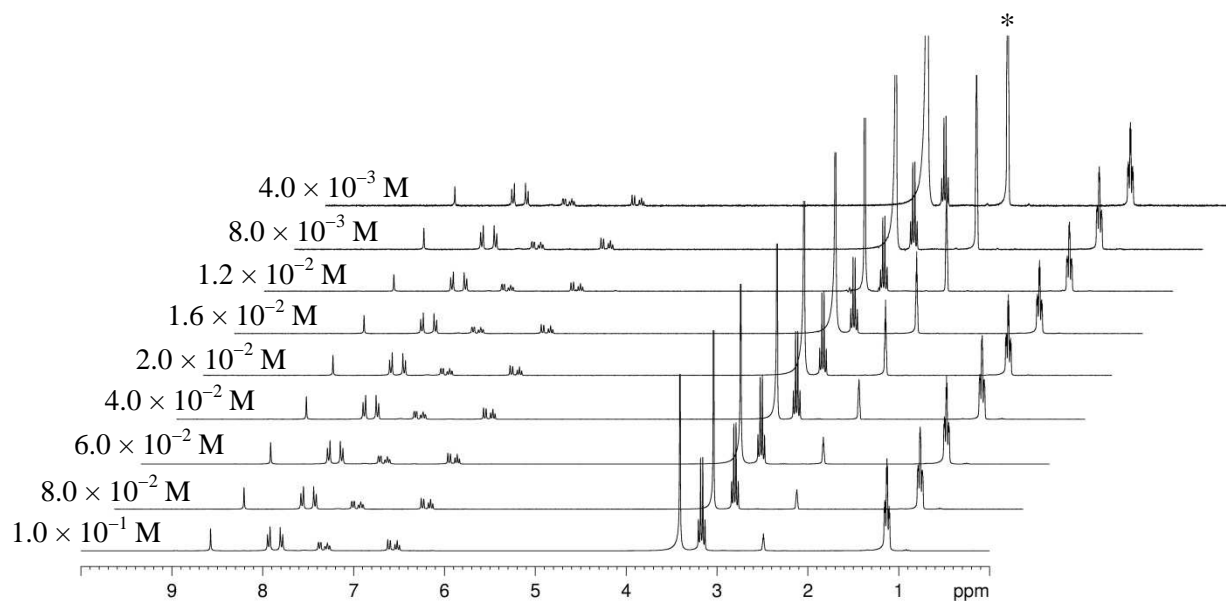

**Fig. S9** Concentration independence of  $^1\text{H}$  NMR spectra of  $[\text{NEt}_4][\text{Zn}(\text{sal}^{\text{H}}\text{-4-CN})\text{Cl}_2]$  (5) in  $\text{DMSO-}d_6$  at room temperature.

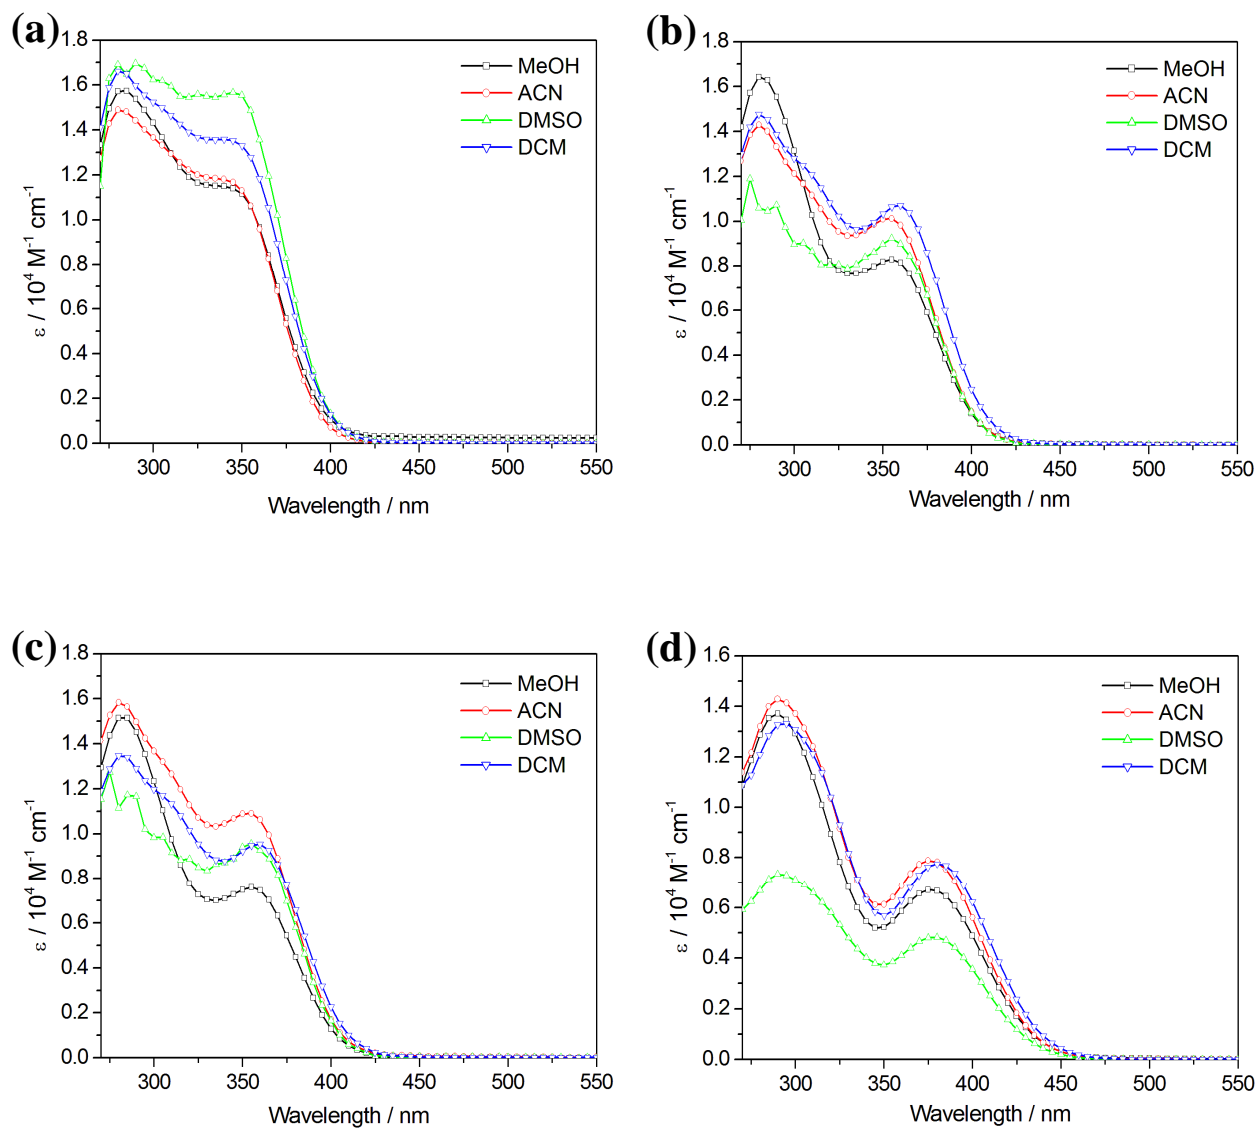

**Fig. S10** UV-vis absorption spectra of (a) Hsal<sup>H</sup>-4-CN, (b) Hsal<sup>Cl</sup>-4-CN, (c) Hsal<sup>Br</sup>-4-CN, and (d) Hsal<sup>OMe</sup>-4-CN in various solvents (100  $\mu\text{M}$ ) at room temperature.

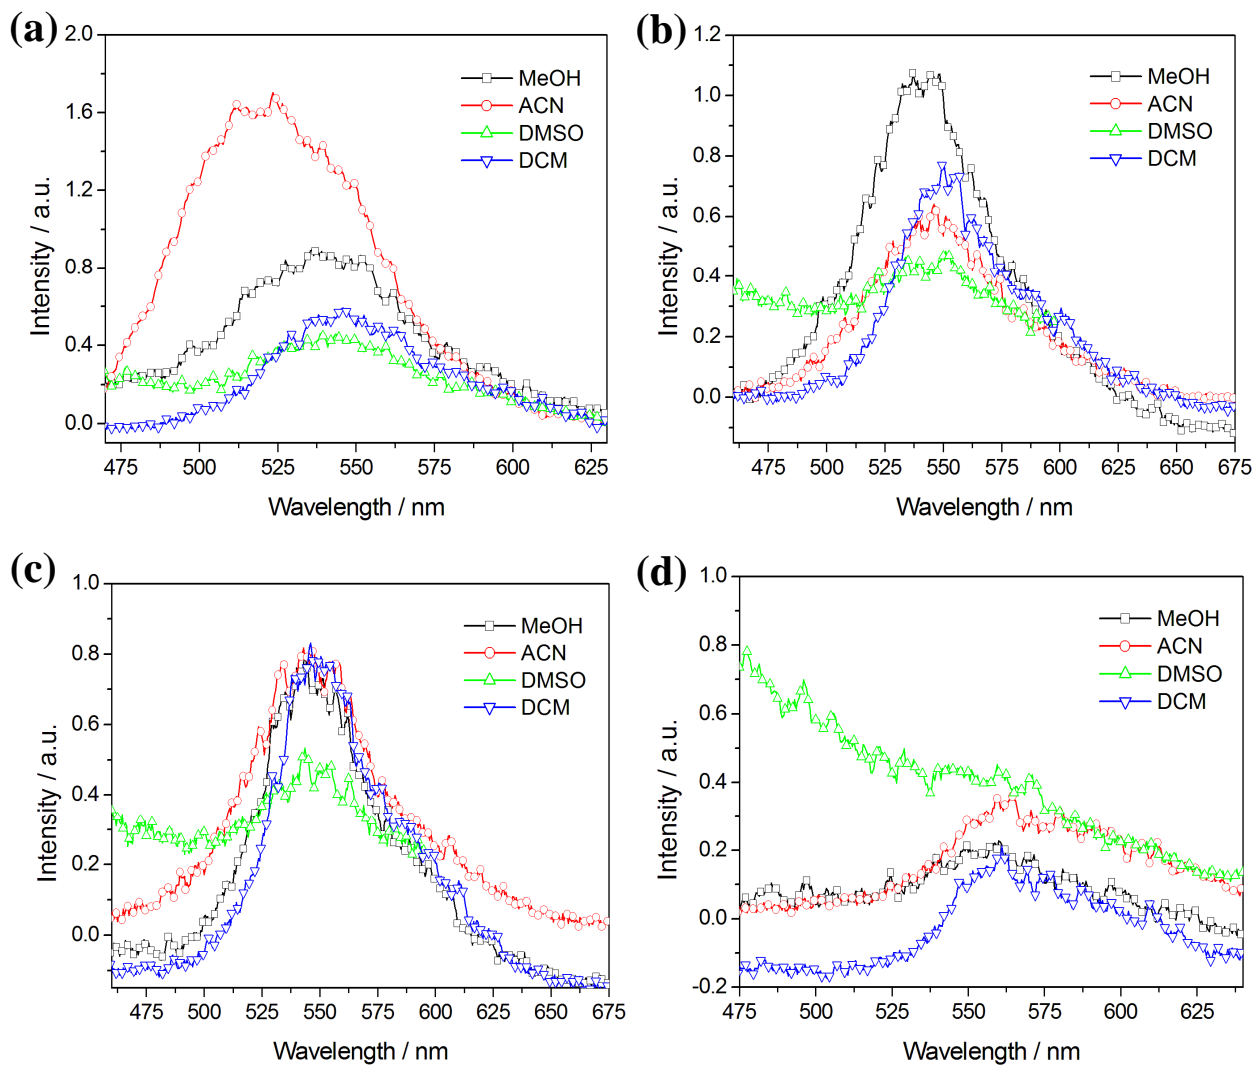

**Fig. S11** Fluorescence spectra of (a) Hsal<sup>H</sup>-4-CN, (b) Hsal<sup>Cl</sup>-4-CN, (c) Hsal<sup>Br</sup>-4-CN, and (d) Hsal<sup>OMe</sup>-4-CN in various solvents (100  $\mu$ M) at room temperature.

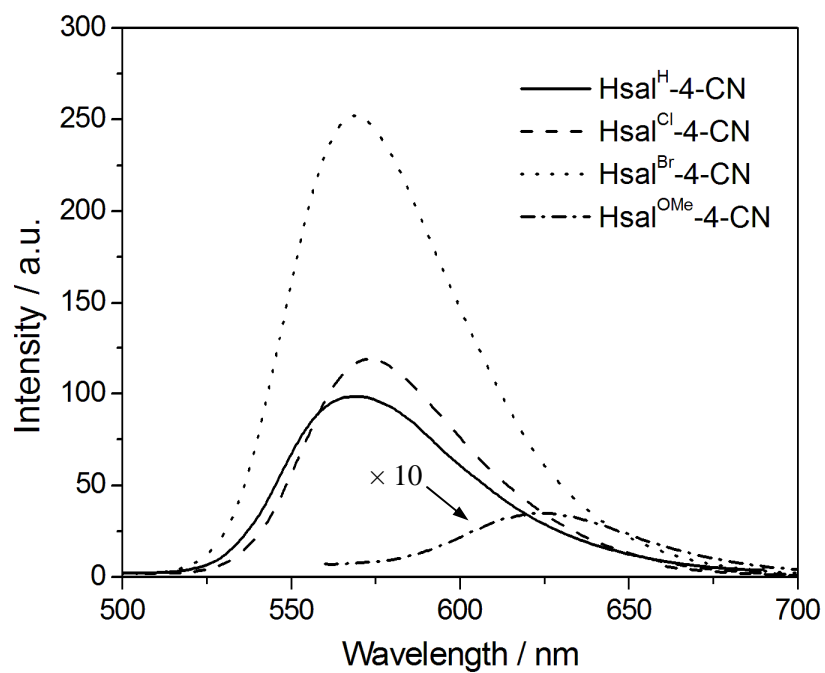

**Fig. S12** Solid-state fluorescence spectra of Hsal<sup>R</sup>-4-CN (R = H, Cl, Br, and OMe) ligands at room temperature.

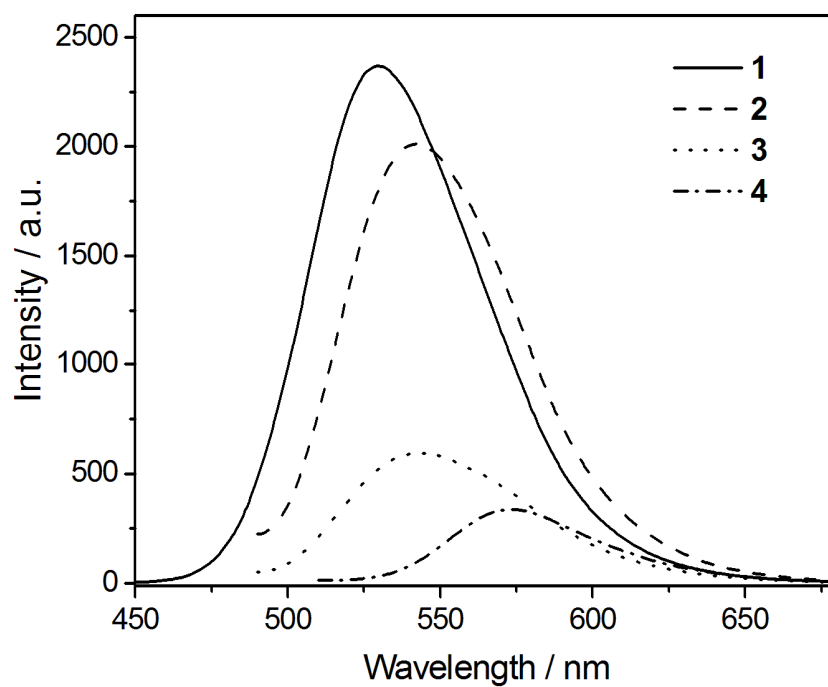

**Fig. S13** Solid-state fluorescence spectra of compounds **1–4** at room temperature.

**Table S1** Selected bond lengths (Å) and angles (°) and dihedral angle  $\theta$  (°) between the salicylideneimine phenyl ring and the benzonitrile phenyl ring for zinc–salicylideneimine compounds **1–5**

| Compound          |             |            |            | <b>4</b>   |             | <b>5</b>   |
|-------------------|-------------|------------|------------|------------|-------------|------------|
|                   | <b>1</b>    | <b>2</b>   | <b>3</b>   | Molecule I | Molecule II |            |
| Zn1/2–O1/3        | 1.9598(11)  | 1.9551(12) | 1.9555(15) | 1.956(4)   | 1.950(4)    | 1.9345(16) |
| Zn1/2–N1/4        | 2.0471(13)  | 2.0473(13) | 2.0393(17) | 2.031(5)   | 2.054(5)    | 2.0360(19) |
| Zn1/2–Cl1/3       | 2.2452(4)   | 2.2287(5)  | 2.2293(8)  | 2.241(2)   | 2.244(2)    | 2.2646(6)  |
| Zn1/2–Cl2/4       | 2.2300(4)   | 2.2313(6)  | 2.2233(8)  | 2.232(2)   | 2.233(2)    | 2.2418(7)  |
| O1/3–Zn1/2–N1/4   | 94.00(5)    | 95.50(5)   | 95.50(5)   | 95.7(2)    | 93.6(2)     | 95.42(7)   |
| O1/3–Zn1/2–Cl1/3  | 114.73(4)   | 110.15(4)  | 108.52(5)  | 112.43(17) | 115.91(17)  | 111.87(5)  |
| O1/3–Zn1/2–Cl2/4  | 111.68(3)   | 108.50(4)  | 109.91(5)  | 107.42(14) | 106.15(15)  | 112.47(5)  |
| N1/4–Zn1/2–Cl1/3  | 106.93(4)   | 118.18(4)  | 106.55(5)  | 106.63(17) | 105.46(17)  | 102.96(6)  |
| N1/4–Zn1/2–Cl2/4  | 115.45(4)   | 106.83(4)  | 118.21(6)  | 118.00(18) | 121.81(18)  | 119.33(5)  |
| Cl1/3–Zn1/2–Cl2/4 | 112.728(16) | 115.60(2)  | 115.92(3)  | 115.15(8)  | 112.95(8)   | 113.28(3)  |
| $\theta$          | 26.5        | 1.9        | 2.2        | 36.5       | 6.3         | 22.5       |

**Table S2** Dissociation ratio ( $R_D$ ) of **1** in DMSO- $d_6$  with different concentrations at room temperature<sup>a</sup>

| Concentration (M)    | Dissociation Ratio ( $R_D$ ) |
|----------------------|------------------------------|
| $4.0 \times 10^{-3}$ | 52.2                         |
| $8.0 \times 10^{-3}$ | 43.8                         |
| $1.2 \times 10^{-2}$ | 40.5                         |
| $1.6 \times 10^{-2}$ | 36.7                         |
| $2.0 \times 10^{-2}$ | 32.4                         |
| $4.0 \times 10^{-2}$ | 29.1                         |
| $6.0 \times 10^{-2}$ | 25.4                         |
| $8.0 \times 10^{-2}$ | 21.9                         |
| $1.0 \times 10^{-1}$ | 18.0                         |

<sup>a</sup> $R_D = I_{CH=N(HL)} / \{I_{CH=N(HL)} + I_{CH=N([Zn(L)Cl_2]^-)}\} \times 100$ , where  $I_{CH=N(HL)}$  = relative integrated area of the azomethine proton (CH=N) signal of free ligand form and  $I_{CH=N([Zn(L)Cl_2]^-)}$  = relative integrated area of the azomethine proton (CH=N) signal of complex form.
